# Supplementary material
Source: Springer Nature journal article supplement (https://www.springermedizin.de/resource/supplementary/12880_2013_215_MOESM1_ESM.pdf/9450248)
Supplement: MOESM1 [file 9450248]

## Appendix 1. QUADAS checklist

**First Author:**

**Assessor:**

**Date:**

**Journal:**

| Item                                                                 |                                                                                                                                                                                            | Yes | No | ? |
|----------------------------------------------------------------------|--------------------------------------------------------------------------------------------------------------------------------------------------------------------------------------------|-----|----|---|
| 1                                                                    | Was the spectrum of patients representative of the patients who will receive the test in practice? (Spectrum composition bias)                                                             |     |    |   |
| Comment: Do info but probably patients in orthopaedic surgery clinic |                                                                                                                                                                                            |     |    |   |
| 2                                                                    | Were selection criteria clearly described?                                                                                                                                                 |     |    |   |
| Comment:                                                             |                                                                                                                                                                                            |     |    |   |
| 3                                                                    | Is the reference standard likely to correctly classify the target condition?                                                                                                               |     |    |   |
| Comment:                                                             |                                                                                                                                                                                            |     |    |   |
| 4                                                                    | Is the time period between reference standard and index test short enough to be reasonably sure that the target condition did not change between the two tests? (Disease progression bias) |     |    |   |
| Comment:                                                             |                                                                                                                                                                                            |     |    |   |
| 5                                                                    | Did the whole sample or a random selection of the sample, receive verification using a reference standard of diagnosis? (Partial verification bias)                                        |     |    |   |
| Comment:                                                             |                                                                                                                                                                                            |     |    |   |
| 6                                                                    | Did patients receive the same reference standard regardless of the index test result?                                                                                                      |     |    |   |
| Comment:                                                             |                                                                                                                                                                                            |     |    |   |
| 7                                                                    | Was the reference standard independent of the index test (i.e. the index test did not form part of the reference standard)? (Incorporation bias)                                           |     |    |   |
| Comment:                                                             |                                                                                                                                                                                            |     |    |   |

|                                        |                                                                                                                                                          |   |   |   |
|----------------------------------------|----------------------------------------------------------------------------------------------------------------------------------------------------------|---|---|---|
| 8                                      | Was the execution of the index test described in sufficient detail to permit replication of the test?                                                    |   |   |   |
| Comment:                               |                                                                                                                                                          |   |   |   |
| 9                                      | Was the execution of the reference standard described in sufficient detail to permit its replication?                                                    |   |   |   |
| Comment:                               |                                                                                                                                                          |   |   |   |
| 10                                     | Were the index test results interpreted without knowledge of the results of the reference standard? (Test review bias)                                   |   |   |   |
| Comment:                               |                                                                                                                                                          |   |   |   |
| 11                                     | Were the reference standard results interpreted without knowledge of the results of the index test? (Reference review bias)                              |   |   |   |
| Comment:                               |                                                                                                                                                          |   |   |   |
| 12                                     | Were the same clinical data available when test results were interpreted as would be available when the test is used in practice? (Clinical review bias) |   |   |   |
| Comment: as per Whiting instructions   |                                                                                                                                                          |   |   |   |
| 13                                     | Were uninterpretable/ intermediate test results reported?                                                                                                |   |   |   |
| Comment: no mention                    |                                                                                                                                                          |   |   |   |
| 14                                     | Were withdrawals from the study explained?                                                                                                               |   |   |   |
| Comment: all completed                 |                                                                                                                                                          |   |   |   |
| <b>Total score</b><br>Yes = 1 No/? = 0 |                                                                                                                                                          | 9 | 4 | 1 |
| Comments:                              |                                                                                                                                                          |   |   |   |

References: QUADAS from Whiting et al., 2003; Bias categories from Fontela et al., 2009  
Key: QUADAS, Quality Assessment for Diagnostic Accuracy Studies

## Appendix 2. STARD Checklist

### Source and Extraction

|              |  |                |  |
|--------------|--|----------------|--|
| Author       |  | Reference test |  |
| Year         |  | Index test     |  |
| Extractor    |  | Country        |  |
| Multicentre? |  |                |  |
| Comments:    |  |                |  |

|                                                                                                                    |     |    |
|--------------------------------------------------------------------------------------------------------------------|-----|----|
| Was the article identified as a study of diagnostic accuracy (recommend MeSH heading sensitivity and specificity?) | Yes | No |
|--------------------------------------------------------------------------------------------------------------------|-----|----|

|                           |               |
|---------------------------|---------------|
| STARD QUESTION #1. If.... |               |
| Yes                       | Well covered  |
| No                        | Not addressed |

|              |                |
|--------------|----------------|
| Primary aims | Secondary aims |
|              |                |

|                                                                                                           |        |                      |
|-----------------------------------------------------------------------------------------------------------|--------|----------------------|
| STARD QUESTION #2.                                                                                        |        |                      |
| Was determining the diagnostic accuracy set as:                                                           |        | If yes, grade as:    |
| a. Primary research aim                                                                                   | Yes/No | Well covered         |
| b. Secondary research aim                                                                                 | Yes/No | Adequately addressed |
| Was the research aim to determine correlation of results rather than determining the diagnostic accuracy? | Yes/No | Poorly addressed     |

|                    |                    |
|--------------------|--------------------|
| Inclusion Criteria | Exclusion Criteria |
|                    | 1.                 |

|                               |                               |
|-------------------------------|-------------------------------|
| Were patients recruited from: | Check if related to the study |
| Private hospitals             |                               |
| Public hospitals              |                               |
| Clinics                       |                               |
| Sports centres                |                               |
| General population            |                               |
| Not indicated:                |                               |
| Others:                       |                               |

|                                                                                                                                                                                     |                      |
|-------------------------------------------------------------------------------------------------------------------------------------------------------------------------------------|----------------------|
| STARD QUESTION #3. If...                                                                                                                                                            | Grade as:            |
| Inclusion criteria/exclusion criteria/setting were given.....                                                                                                                       | Well covered         |
| Inclusion criteria/exclusion criteria were given....                                                                                                                                | Adequately addressed |
| Exclusion criteria were not mentioned                                                                                                                                               | Poorly addressed     |
| Participants were simply stated as being referred by general practitioners/orthopaedic surgeons ....<br>For this paper, the inclusion/exclusion criteria were based on MRI findings | Poorly addressed     |

|                    |                           |
|--------------------|---------------------------|
| Recruitment period | Start to end (month/year) |
|                    |                           |

|                                                           |               |
|-----------------------------------------------------------|---------------|
| STARD QUESTION #14. If...                                 | Grade as      |
| Beginning and end of recruitment were indicated, then.... | Well covered  |
| If none was given, then....                               | Not addressed |

|                                                  |                                |
|--------------------------------------------------|--------------------------------|
| Was recruitment based on:                        | Check if related to the study: |
| Presenting symptoms                              |                                |
| Results from previous tests outside of the study |                                |
| Results from tests conducted during the study    |                                |

|                                  |                                |
|----------------------------------|--------------------------------|
| Were the participants recruited: | Check if related to the study. |
| Consecutively                    |                                |
| Non-consecutively                |                                |
| Prospectively                    |                                |
| Retrospectively                  |                                |

|                                                                                                                                                                              |                  |
|------------------------------------------------------------------------------------------------------------------------------------------------------------------------------|------------------|
| STARD QUESTION #4. If...                                                                                                                                                     | Grade as:        |
| Either one of these was mentioned: recruitment was based on presenting symptoms, results from previous tests outside of the study, form tests conducted as part of the study | Well covered     |
| Simply stated that recruitment was based on symptoms of lateral epicondylitis                                                                                                | Poorly addressed |
| Implied or not directly stated                                                                                                                                               | Poorly addressed |

|                                                                               |               |
|-------------------------------------------------------------------------------|---------------|
| STARD QUESTIONS #5,6. If....                                                  | Grade as      |
| Type of recruitment (consecutive/non-consecutive) was specified, then....     | Well covered  |
| Type of data collection (prospective, restrospective) was specified, then.... | Well covered  |
| Type of recruitment was not specified, then....                               | Not addressed |
| Type of data collection was not specified, then....                           | Not addressed |

|                                                     |                                |
|-----------------------------------------------------|--------------------------------|
| What was the reference standard used in the study?  | Check if related to the study: |
| Activities exacerbating the pain                    |                                |
| Previous medical diagnosis of lateral epicondylitis |                                |
| Tenderness on the lateral epicondyle                |                                |
| Tenderness surrounding the lateral epicondyle       |                                |
| Cozen's test                                        |                                |
| Mill's test                                         |                                |
| Maudsley's test                                     |                                |
| Handgrip test                                       |                                |
| Others: please specify.                             | Clinical findings              |

|                                         |                                                                                          |
|-----------------------------------------|------------------------------------------------------------------------------------------|
| Rationale for use of reference standard | <ol style="list-style-type: none"> <li>1.</li> <li>2.</li> <li>3.</li> <li>4.</li> </ol> |
|-----------------------------------------|------------------------------------------------------------------------------------------|

| STARD QUESTION #7. If....                              | Grade as             |
|--------------------------------------------------------|----------------------|
| Reference standard and rationale were stated, then.... | Well covered         |
| The reference standard was identified, then....        | Adequately addressed |
| The reference standard was just implied, then....      | Poorly addressed     |
| Reference standard was not mentioned, then....         | Not addressed        |

|                                   |  |                                 |
|-----------------------------------|--|---------------------------------|
| Musculoskeletal Ultrasound (MSUS) |  | Check the cell if not mentioned |
| Brand of MSUS machine             |  |                                 |
| Frequency of MSUS machine         |  |                                 |
| Frequency of transducer head      |  |                                 |
| If Doppler Imaging was used       |  |                                 |
| Pulsed repetition frequency       |  |                                 |
| Wall filter                       |  |                                 |
| Colour gain                       |  |                                 |

|               | Please encircle appropriate answer. | Please specify range in which joints were positioned during scan. |
|---------------|-------------------------------------|-------------------------------------------------------------------|
| Shoulder      | Flexed                              | ROM:                                                              |
|               | Extended                            | ROM:                                                              |
| Elbow         | Flexed                              | ROM:                                                              |
|               | Extended                            | ROM:                                                              |
|               | Neutral                             |                                                                   |
|               | Pronated                            | ROM:                                                              |
| Wrist         | Supinated                           | ROM:                                                              |
|               | Neutral                             |                                                                   |
|               | Flexed                              | ROM:                                                              |
| Not mentioned | Extended                            | ROM:                                                              |
|               |                                     |                                                                   |

|                                                        |                                                                       |
|--------------------------------------------------------|-----------------------------------------------------------------------|
| What pressure was used by the sonographer in scanning? | Mild pressure<br>Moderate pressure<br>Heavy pressure<br>Not mentioned |
|--------------------------------------------------------|-----------------------------------------------------------------------|

| STARD QUESTION #8. If...                                                                                                                                                                                                                                                                   | Grade as             |
|--------------------------------------------------------------------------------------------------------------------------------------------------------------------------------------------------------------------------------------------------------------------------------------------|----------------------|
| The following were all identified:<br>a. Provocation tests used for the reference standard<br>b. At least one of the technical specifications of the ultrasound machine<br>OR At least one of the technical specifications of the probe<br>c. The position of the participants during MSUS | Well covered         |
| The following were identified:<br>a. Provocation tests used for the reference standard<br>b. At least one of the technical specifications of the ultrasound machine<br>OR At least one of the technical specifications of the probe                                                        | Adequately addressed |
| The reference standard was broadly referred to as common tests used in diagnosing LEP                                                                                                                                                                                                      | Poorly addressed     |
| At least one of the technical specifications of the ultrasound machine                                                                                                                                                                                                                     | Poorly addressed     |
| Technical specifications were not mentioned                                                                                                                                                                                                                                                | Not addressed        |

| Kindly write on the blank specific MSUS findings like cortical irregularities, spur, hypoechogenicity, etc.) | Subjective (if merely denotes presence or absence of)<br><br>List the findings: | Objective (if measurements were used)<br><br>List the findings: |
|--------------------------------------------------------------------------------------------------------------|---------------------------------------------------------------------------------|-----------------------------------------------------------------|
|                                                                                                              |                                                                                 |                                                                 |
|                                                                                                              |                                                                                 |                                                                 |
|                                                                                                              |                                                                                 |                                                                 |
|                                                                                                              |                                                                                 |                                                                 |
|                                                                                                              |                                                                                 |                                                                 |
|                                                                                                              |                                                                                 |                                                                 |
|                                                                                                              |                                                                                 |                                                                 |
|                                                                                                              |                                                                                 |                                                                 |



|                                                                                            |                      |
|--------------------------------------------------------------------------------------------|----------------------|
| STARD QUESTION #9. If....                                                                  | Grade as             |
| Findings on reference standard and index tests were given, then....                        | Well covered         |
| Findings on index tests were given, then....                                               | Adequately addressed |
| If findings did not directly determine the diagnostic accuracy of the index test, then.... | Poorly addressed     |
| If none was given, then....                                                                | Not addressed        |

| MSUS findings | Diagnostic accuracy tests (Please specify if sensitivity, specificity, positive likelihood ratio, negative likelihood ratio) | Percentage | 95% confidence interval | Comments |
|---------------|------------------------------------------------------------------------------------------------------------------------------|------------|-------------------------|----------|
|               |                                                                                                                              |            |                         |          |

Other comments:

|                                                                        |                      |
|------------------------------------------------------------------------|----------------------|
| STARD QUESTION #12. If....                                             | Grade as             |
| Results on diagnostic accuracy and its 95% CI were given, then....     | Well covered         |
| Results on diagnostic accuracy without the 95% CI were given, then.... | Adequately addressed |
| Based from raw data, the diagnostic accuracy can be computed, then.... | Poorly addressed     |
| If none was given, then....                                            | Not addressed        |

|                                                                                               |                  |
|-----------------------------------------------------------------------------------------------|------------------|
| STARD QUESTION #21. If....                                                                    | Grade as         |
| Estimates of diagnostic accuracy and measures of statistical uncertainty were given, then.... | Well covered     |
| Estimates of diagnostic accuracy were given, then                                             | Poorly addressed |
| If none was given, then....                                                                   | Not addressed    |

Fill up the 2X2 table. Kindly put on the blank the MSUS feature being tested for diagnostic accuracy.

|                                                      |                                                         |
|------------------------------------------------------|---------------------------------------------------------|
| Number of patients with _____ and with elbow pain    | Number of patients with _____ and without elbow pain    |
| Number of patients without _____ and with elbow pain | Number of patients without _____ and without elbow pain |

|                                                                                                                                            |                      |
|--------------------------------------------------------------------------------------------------------------------------------------------|----------------------|
| STARD QUESTION #19. If....                                                                                                                 | Grade as             |
| Cross tabulation of reference standard and index test was shown, then....                                                                  | Well covered         |
| Cross tabulation was not shown but diagnostic accuracy could be derived from data given in the study and computed by the authors, then.... | Adequately addressed |
| If none was given, then....                                                                                                                | Not addressed        |

#### Expertise of the testers

|                                             | Reference standard | Index test |
|---------------------------------------------|--------------------|------------|
| Profession of tester                        |                    |            |
| Years of training of tester                 |                    |            |
| Profession of reader (if applicable)        |                    |            |
| Years of training of reader (if applicable) |                    |            |

|                                                                                          |                      |
|------------------------------------------------------------------------------------------|----------------------|
| STARD QUESTION #10. If...                                                                | Grade as             |
| Years of training of testers for reference standard and index tests were given, then.... | Well covered         |
| Years of training of tester for index test were given, then....                          | Adequately addressed |
| Years of training of tester for reference standard were given, then....                  | Poorly addressed     |
| Simply stated that the testers were trained, then....                                    | Poorly addressed     |
| If none was given, then....                                                              | Not addressed        |

|                                                                                       | Reference standard | Index test |
|---------------------------------------------------------------------------------------|--------------------|------------|
| Tester was BLINDED to laterality of symptoms or results of previous examinations.     |                    |            |
| Tester was NOT BLINDED to laterality of symptoms or results of previous examinations. |                    |            |

|                                                                                                                                                                                                                |                      |
|----------------------------------------------------------------------------------------------------------------------------------------------------------------------------------------------------------------|----------------------|
| STARD QUESTION # 11. If...                                                                                                                                                                                     | Grade as             |
| The sonographer was blinded to the results of previous examinations of the participant when interpreting index test (MSUS results), then....                                                                   | Well covered         |
| The interpreter was blinded to the results of previous examinations of the participant when interpreting index test (MSUS results), then....                                                                   | Well covered         |
| (If the sonographer and interpreter are different) If the interpreter during interpretation of the participant's MSUS results was blinded to the results of previous examinations of the participant, then.... | Adequately addressed |
| (If the sonographer and interpreter are different) If the sonographer was blinded to the results of previous examinations of the participant, then....                                                         | Poorly addressed     |
| This aspect of this study was ignored, then....                                                                                                                                                                | Not addressed        |

### Reliability of Testers

| Tester | MSUS findings | Results on Reliability | 95% CI on reliability |
|--------|---------------|------------------------|-----------------------|
|        |               |                        |                       |
|        |               |                        |                       |
|        |               |                        |                       |

| STARD QUESTION # 13. If....                                                                                  | Grade as             |
|--------------------------------------------------------------------------------------------------------------|----------------------|
| Results on intra-tester reliability (if study has one tester only) was given, then....                       | Well covered         |
| Results on intra-tester and inter-tester reliability (if study has two or more testers) were given, then.... | Well covered         |
| When one of the intertester/intratester reliability (if study has two or more testers) was given, then....   | Adequately addressed |
| If none was given, then....                                                                                  | Not addressed        |

| STARD QUESTION #24. If....                                                                                                | Grade as             |
|---------------------------------------------------------------------------------------------------------------------------|----------------------|
| 95% CI or SD was given for reliability tests, then....                                                                    | Well covered         |
| (Applicable to two or more testers) 95% CI or SD was missing for either one of intra or intertester reliability, then.... | Adequately addressed |
| If none was given, then....                                                                                               | Not addressed        |

### Demographics

|                                 | Total | Male | Female |
|---------------------------------|-------|------|--------|
| Number                          |       |      |        |
| Number who underwent sonography |       |      |        |
| Age                             |       |      |        |
| Duration of elbow symptoms      |       |      |        |
| Number of symptomatic elbows    |       |      |        |
| Number of asymptomatic elbows   |       |      |        |
| Severity of symptoms (i.e. VAS) |       |      |        |
| Current treatment               |       |      |        |
| Other:                          |       |      |        |

|                                    |  |
|------------------------------------|--|
| <b>Number of Excluded patients</b> |  |
| LE group                           |  |
|                                    |  |
| Healthy group                      |  |
|                                    |  |

|                      |       |      |        |
|----------------------|-------|------|--------|
| Healthy participants | Total | Male | Female |
| Number               |       |      |        |
| Age                  |       |      |        |
| Others:              |       |      |        |

|                                                                                                                                                |                      |
|------------------------------------------------------------------------------------------------------------------------------------------------|----------------------|
| STARD QUESTION #15. If...                                                                                                                      | Grade as             |
| Age, sex, duration of symptoms, number of symptomatic and asymptomatic elbows, severity of symptoms AND current treatment were given, then.... | Well covered         |
| Age, sex, duration of symptoms and number of symptomatic and asymptomatic elbows were given, then....                                          | Adequately addressed |
| Not covered in categories well covered and adequately addressed, then....                                                                      | Poorly addressed     |
| If none was given, then....                                                                                                                    | Not addressed        |

Drop-outs

|                                                   |                    |            |
|---------------------------------------------------|--------------------|------------|
|                                                   | Reference standard | Index test |
| Number of participants that did not undergo tests | 0                  | 1          |

|                                                                                                 |                  |
|-------------------------------------------------------------------------------------------------|------------------|
| STARD QUESTION #16. If...                                                                       | Grade as         |
| The drop-outs were not discussed explicitly due to absence of drop-outs, then....               | Well covered     |
| The number of drop-outs and reasons behind dropping-out for index test were indicated, then.... | Well covered     |
| The number of drop-outs of index test was indicated, then....                                   | Poorly addressed |
| Not mentioned or indicates that this aspect of the study was ignored, then....                  | Not addressed    |

|                                                                                                                                                                    |                  |
|--------------------------------------------------------------------------------------------------------------------------------------------------------------------|------------------|
| STARD QUESTION #22. If....                                                                                                                                         | Grade as         |
| There were no drop-outs/outliers/missing responses based on flow of the study (even without stating zero to report drop-outs/outliers/missing responses), then.... | Well covered     |
| drop-outs/outliers/missing responses were indicated and inclusion/exclusion in the analysis was defended, then....                                                 | Well covered     |
| drop-outs/outliers/missing responses were indicated and inclusion/exclusion in the analysis was not explained, then....                                            | Poorly addressed |
| Drop-outs/outliers/missing responses were not indicated                                                                                                            | Not addressed    |

|                                                               |  |
|---------------------------------------------------------------|--|
| What is the time interval between provocation tests and MSUS? |  |
| Comments                                                      |  |

|                                                                                                                 |                  |
|-----------------------------------------------------------------------------------------------------------------|------------------|
| STARD QUESTION # 17. If....                                                                                     | Grade as         |
| Time interval between reference standard and index test was indicated, then....                                 | Well covered     |
| The time interval between the reference standard and index test was implied and not explicitly stated, then.... | Poorly addressed |
| Not mentioned or indicates that this aspect of the study was ignored, then....                                  | Not addressed    |

|                                                                     |     |    |
|---------------------------------------------------------------------|-----|----|
| Were the participants categorised according to severity of disease? | Yes | No |
|---------------------------------------------------------------------|-----|----|

|                                                                         |               |
|-------------------------------------------------------------------------|---------------|
| STARD QUESTION #18. If....                                              | Grade as      |
| Severity of disease was categorised for participants with LEP, then.... | Well covered  |
| Categories on severity of disease were not made, then....               | Not addressed |

|                                                                                                                    |               |
|--------------------------------------------------------------------------------------------------------------------|---------------|
| STARD QUESTION #23. If....                                                                                         | Grade as      |
| Estimates of variability of diagnostic accuracy between subgroups of participants, readers or centers, if done     | Well covered  |
| Estimates of variability of diagnostic accuracy between subgroups of participants, readers or centers, if NOT done | Not addressed |

|                          |  | Reference standard         | Index test                 |
|--------------------------|--|----------------------------|----------------------------|
| Adverse effects of tests |  | 1.<br>2.<br>3.<br>4.<br>5. | 1.<br>2.<br>3.<br>4.<br>5. |

|                                                        |               |
|--------------------------------------------------------|---------------|
| STARD QUESTION #20. If...                              | Grade as      |
| Adverse events for index test were indicated, then.... | Well covered  |
| Adverse events were not mentioned....                  | Not addressed |

What is the clinical applicability of the study findings?

|                                                                                |                  |
|--------------------------------------------------------------------------------|------------------|
| STARD QUESTION #25. If....                                                     | Grade as         |
| Discussed appropriate to the results obtained, then....                        | Well covered     |
| Discussed but not fully supported by the results obtained, then....            | Poorly addressed |
| Not mentioned or indicates that this aspect of the study was ignored, then.... | Not addressed    |

Key: STARD, Standards for Reporting of Diagnostic Accuracy

## Appendix 3. Search results

| Database                                                                                                                                                                       | No | Keyword                                                                                                                                                                                                                              | Hits      |
|--------------------------------------------------------------------------------------------------------------------------------------------------------------------------------|----|--------------------------------------------------------------------------------------------------------------------------------------------------------------------------------------------------------------------------------------|-----------|
| <b>OVID</b><br>(AMED, Books@Ovid, Journals@Ovid Full Text, EMBASE, ICONDA, OVID Medline, Ovid Nursing database, Your Journals@Ovid, The Joanna Briggs Institute EBP Database ) | 1  | Lateral epicondylitis OR tennis elbow OR radial epicondylalgia OR lateral epicondylalagia OR extensor tendinopath* OR epicondylitis lateralis humeris OR lateral elbow tendinopath* OR lateral epicondylosis OR lateral tennis elbow | 6,617     |
|                                                                                                                                                                                | 2  | Limit #1 to 1990-Current                                                                                                                                                                                                             | 5,573     |
|                                                                                                                                                                                | 3  | Sonography OR ultrasound OR musculoskeletal ultrasound OR diagnostic ultrasound                                                                                                                                                      | 782,783   |
|                                                                                                                                                                                | 4  | Limit #3 to 1990-Current                                                                                                                                                                                                             | 710,393   |
|                                                                                                                                                                                | 5  | Sensitivity OR specificity OR diagnostic accuracy OR diagnosis OR accuracy                                                                                                                                                           | 9,765,039 |
|                                                                                                                                                                                | 6  | Limit #5 to 1990-Current                                                                                                                                                                                                             | 7,261,585 |
|                                                                                                                                                                                | 7  | 1+3+5                                                                                                                                                                                                                                | 650       |
|                                                                                                                                                                                | 8  | Limit #7 to 1990-Current                                                                                                                                                                                                             | 643       |
|                                                                                                                                                                                | 9  | De duplicate #8                                                                                                                                                                                                                      | 517       |



| Database                                                                                                                                                                                                          | No | Keyword                                                                                                                                                                                                      | Hits      |
|-------------------------------------------------------------------------------------------------------------------------------------------------------------------------------------------------------------------|----|--------------------------------------------------------------------------------------------------------------------------------------------------------------------------------------------------------------|-----------|
| <b>EBSCO</b><br>(Academic Search Premier, Ageline, CINHALL, E-journals, Ergonomics Abstracts, ERIC, Health Source-Consumer edition, Health Source-Nursing Academic edition, PsycArticles, PsycBOOKS, SPORTDiscus) | 1  | lateral epicondylitis OR tennis elbow OR radial epicondyl* OR lateral epicondyl* OR extensor tendinopath* OR epicondylitis lateralis humer*s OR lateral elbow tendinopath* OR lateral tennis elbow           | 4,530     |
|                                                                                                                                                                                                                   | 2  | Limit 1 from 1990-2013                                                                                                                                                                                       | 4,081     |
|                                                                                                                                                                                                                   | 3  | Sonography OR ultrasound OR musculoskeletal ultrasound OR diagnostic ultrasound                                                                                                                              | 266,962   |
|                                                                                                                                                                                                                   | 4  | Limit 3 from 1990-2013                                                                                                                                                                                       | 257,867   |
|                                                                                                                                                                                                                   | 5  | sensitivity OR specificity OR diagnostic accuracy OR diagnosis OR accuracy OR ROC OR false positive OR false negative OR predictive value\$ OR likelihood ratio\$ OR reference values OR reference standards | 2,887,388 |
|                                                                                                                                                                                                                   | 6  | Limit 5 from 1990-2013                                                                                                                                                                                       | 2,669,690 |
|                                                                                                                                                                                                                   | 7  | 1 + 3 + 5                                                                                                                                                                                                    | 102       |
|                                                                                                                                                                                                                   | 8  | 2 + 4 + 6                                                                                                                                                                                                    | 101       |

| Database | No | Keyword                                                                                                                                                                                                                    | Hits   |
|----------|----|----------------------------------------------------------------------------------------------------------------------------------------------------------------------------------------------------------------------------|--------|
| COCHRANE | 1  | Lateral epicondyl* OR tennis elbow OR radial epicondyla* OR lateral epicondyla* OR extensor tendinopath* OR epicondylitis lateralis humeris OR lateral elbow tendinopath* OR lateral epicondylosis OR lateral tennis elbow | 357    |
|          | 2  | Limit 1 from 1990-2013                                                                                                                                                                                                     | 329    |
|          | 3  | Sonography OR ultrasound OR musculoskeletal ultrasound OR diagnostic ultrasound                                                                                                                                            | 7,551  |
|          | 4  | Limit 3 from 1990-2013                                                                                                                                                                                                     | 7,140  |
|          | 5  | sensitivity OR specificity OR diagnostic accuracy OR diagnosis OR accuracy OR ROC OR false positive OR false negative OR predictive value\$ OR likelihood ratio\$ OR reference values OR reference standards               | 68,382 |
|          | 6  | Limit 5 from 1990-2013                                                                                                                                                                                                     | 62,095 |
|          | 7  | 1+3+5                                                                                                                                                                                                                      | 1,197  |
|          | 8  | 2+4+6                                                                                                                                                                                                                      | 1,093  |

| Database         | No | Keyword                                                                                                                                                                                                                                                                                                                                                                                                                                                                                                                                                                                                                       | Hits      |
|------------------|----|-------------------------------------------------------------------------------------------------------------------------------------------------------------------------------------------------------------------------------------------------------------------------------------------------------------------------------------------------------------------------------------------------------------------------------------------------------------------------------------------------------------------------------------------------------------------------------------------------------------------------------|-----------|
| Web of knowledge | 1  | Lateral epicondylitis OR tennis elbow OR radial epicondylalgia OR lateral epicondylalgia OR extensor tendinopath* OR epicondylitis lateralis humeris OR lateral elbow tendinopath* OR lateral epicondylosis OR lateral tennis elbow (1950-2012)                                                                                                                                                                                                                                                                                                                                                                               | 4,574     |
|                  | 2  | Limit 1 from 1990-2013                                                                                                                                                                                                                                                                                                                                                                                                                                                                                                                                                                                                        | 4,086     |
|                  | 3  | Sonography OR ultrasound OR musculoskeletal ultrasound OR diagnostic ultrasound (1950-2012)                                                                                                                                                                                                                                                                                                                                                                                                                                                                                                                                   | 514,513   |
|                  | 4  | Limit 3 from 1990-2013                                                                                                                                                                                                                                                                                                                                                                                                                                                                                                                                                                                                        | 481,298   |
|                  | 5  | "sensitivity and specificity" OR "sensitivity and specificity/standards" OR "specificity" OR "screening" OR "false positive" OR "false negative" OR "accuracy" OR "predictive value" OR "predictive value of tests" OR "predictive value of tests/standards" OR "predictive values" OR "predictive values of tests" OR "reference value" OR "reference values" OR "reference values/standards" OR "roc" OR "roc analyses" OR "roc analysis" OR "roc and" OR "roc area" OR "roc auc" OR "roc characteristics" OR "roc curve" OR "roc estimated" OR "roc evaluation" OR "likelihood ratio" OR "diagnostic accuracy" (1950-2012) | 3,898,364 |
|                  | 6  | Limit 5 from 1990-2013                                                                                                                                                                                                                                                                                                                                                                                                                                                                                                                                                                                                        | 3,502,131 |
|                  | 7  | 1+3+5                                                                                                                                                                                                                                                                                                                                                                                                                                                                                                                                                                                                                         | 21        |
|                  | 8  | 2+4+6                                                                                                                                                                                                                                                                                                                                                                                                                                                                                                                                                                                                                         | 21        |

| Database       | No | Keyword                                                                                                                                                                                                                                             | Hits      |
|----------------|----|-----------------------------------------------------------------------------------------------------------------------------------------------------------------------------------------------------------------------------------------------------|-----------|
| Web of Science | 1  | Lateral epicondylitis OR tennis elbow OR radial epicondylalgia OR lateral epicondylalagia OR extensor tendinopath* OR epicondylitis lateralis humeris OR lateral elbow tendinopath* OR lateral epicondylosis OR lateral tennis elbow (1983-2013)    | 1,400     |
|                | 2  | Sonography OR ultrasound OR musculoskeletal ultrasound OR diagnostic ultrasound (1983-2013)                                                                                                                                                         | 202,994   |
|                | 3  | Sensitivity OR specificity OR diagnostic accuracy OR diagnosis OR accuracy (1983-2013)                                                                                                                                                              | 2,163,053 |
|                | 4  | 1+2+3                                                                                                                                                                                                                                               | 46        |
|                | 5  | Limit #4 to 1999-2013                                                                                                                                                                                                                               | 46        |
|                |    |                                                                                                                                                                                                                                                     |           |
| Science Direct | 1  | Lateral epicondylitis OR tennis elbow OR radial epicondylalgia OR lateral epicondylalagia OR extensor tendinopath* OR epicondylitis lateralis humeris OR lateral elbow tendinopath* OR lateral epicondylosis OR lateral tennis elbow (1823-present) | 103       |
|                | 2  | Limit 1 from 1990-2013                                                                                                                                                                                                                              | 102       |
|                | 3  | Sonography OR ultrasound OR musculoskeletal ultrasound OR diagnostic ultrasound (1823-present)                                                                                                                                                      | 345,779   |
|                | 4  | Limit 3 from 1990-2013                                                                                                                                                                                                                              | 314,962   |
|                | 5  | Sensitivity OR specificity OR diagnostic accuracy OR diagnosis OR accuracy (1823-present)                                                                                                                                                           | 1,201.090 |
|                | 6  | Limit from 1990-2013                                                                                                                                                                                                                                | 992,682   |
|                | 7  | 1+3+5                                                                                                                                                                                                                                               | 29        |
|                | 8  | 2+4+6                                                                                                                                                                                                                                               | 29        |

| Database | No | Keyword                                                                                                                                                                                                                    | Hits      |
|----------|----|----------------------------------------------------------------------------------------------------------------------------------------------------------------------------------------------------------------------------|-----------|
| PubMed   | 1  | Lateral epicondyl* OR tennis elbow OR radial epicondyla* OR lateral epicondyla* OR extensor tendinopath* OR epicondylitis lateralis humeris OR lateral elbow tendinopath* OR lateral epicondylosis OR lateral tennis elbow | 1,909     |
|          | 2  | Limit 1 from 1990-2013                                                                                                                                                                                                     | 1,528     |
|          | 3  | Sonography OR ultrasound OR musculoskeletal ultrasound OR diagnostic ultrasound                                                                                                                                            | 412,343   |
|          | 4  | Limit 3 from 1990-2013                                                                                                                                                                                                     | 336,133   |
|          | 5  | sensitivity OR specificity OR diagnostic accuracy OR diagnosis OR accuracy OR ROC OR false positive OR false negative OR predictive value* OR likelihood ratio* OR reference value* OR reference standard*                 | 8,846,967 |
|          | 6  | Limit from 1990-2013                                                                                                                                                                                                       | 6,031,537 |
|          | 7  | 1+2+3                                                                                                                                                                                                                      | 98        |
|          | 8  | 2+4+6                                                                                                                                                                                                                      | 96        |

| Database               | No | Keyword                                                                                                                                                  | Hits |
|------------------------|----|----------------------------------------------------------------------------------------------------------------------------------------------------------|------|
| <b>HIGH WIRE PRESS</b> | 1  | lateral epicondy* OR tennis elbow AND ultrasound AND sensitivity OR specificity OR diagnostic accuracy OR accuracy                                       | 29   |
|                        | 2  | Limit 1 from 1990-2013                                                                                                                                   | 29   |
|                        |    |                                                                                                                                                          |      |
| <b>GOOGLE SCHOLAR</b>  | 1  | tennis elbow OR lateral epicondylitis AND sonography OR ultrasound OR diagnostic ultrasound OR musculoskeletal ultrasound AND sensitivity OR specificity | 701  |
|                        | 2  | Limit 1 from 1990-2013                                                                                                                                   | 648  |

## Appendix 4. NHMRC Hierarchy of Evidence

| Levels of Evidence | Diagnostic Accuracy                                                                                                             | Articles                                                                                                                                                                                                                                                                                                                                                                                                                                                                                                                                                                                                                                                                                                                                                                                                                                                                                                      |
|--------------------|---------------------------------------------------------------------------------------------------------------------------------|---------------------------------------------------------------------------------------------------------------------------------------------------------------------------------------------------------------------------------------------------------------------------------------------------------------------------------------------------------------------------------------------------------------------------------------------------------------------------------------------------------------------------------------------------------------------------------------------------------------------------------------------------------------------------------------------------------------------------------------------------------------------------------------------------------------------------------------------------------------------------------------------------------------|
| I                  | Systematic Review of level II studies                                                                                           | None                                                                                                                                                                                                                                                                                                                                                                                                                                                                                                                                                                                                                                                                                                                                                                                                                                                                                                          |
| II                 | Independent, blinded comparison with a valid reference standard, among consecutive persons with a defined clinical presentation | <p>Ultra sonographic findings for chronic lateral epicondylitis (Obradov and Anderson, 2012)</p> <p>Common extensor tendon thickness measurements at the radiocapitellar region in diagnosis of lateral elbow tendinopathy (Toprak et al., 2012)</p> <p>Utility of Sonographic Measurement of the Common Tensor Tendon in Patients with Lateral Epicondylitis (Lee et al., 2011)</p> <p>Real-Time Sonoelastography of Lateral Epicondylitis: Comparison of Findings Between Patients and Healthy Volunteers (De Zordo et al., 2009)</p> <p>Value of Ultrasonography on Diagnosis and Assessment of Pain and Grip Strength in Patients with Lateral Epicondylitis (Tarhan et al., 2009)</p> <p>Diagnostic Accuracy of power Doppler US in patients with chronic tennis elbow (Du Toit et al., 2008)</p> <p>Extensor origin vascularity related to pain in patients with tennis elbow (Zeisig et al., 2006)</p> |

| Levels of Evidence | Diagnostic Accuracy                                                                                                                 | Articles                                                                                                                                                                                                                                                                                                                                                                                                                                                                                                                              |
|--------------------|-------------------------------------------------------------------------------------------------------------------------------------|---------------------------------------------------------------------------------------------------------------------------------------------------------------------------------------------------------------------------------------------------------------------------------------------------------------------------------------------------------------------------------------------------------------------------------------------------------------------------------------------------------------------------------------|
| III-1              | Independent, blinded comparison with a valid reference standard, among non-consecutive persons with a defined clinical presentation | <p>A two-year sonographic follow-up after intra-tendinous therapy in patients with tennis elbow (Zeisig et al., 2010)</p> <p>The predictive value of Diagnostic Sonography for the Effectiveness of Conservative Treatment of Tennis Elbow (Struijs et al., 2005)</p> <p>Lateral Epicondylitis of the Elbow: US Findings (Levin et al., 2005)</p> <p>Comparison of Sonography and MRI for Diagnosing Epicondylitis (Miller et al., 2002)</p> <p>Tennis elbow: an ultrasonographic study in tennis players (Maffulli et al., 1990)</p> |
| III-2              | A comparison with reference standard that does not meet the criteria required for Level II and III-1 evidence                       | <p>Sonographic probe induced tenderness for lateral epicondylitis (Noh et al., 2010)</p> <p>“Tenomalacia”: a new sonographic sign of tendinopathy? (Khoury and Cardinal, 2009)</p> <p>Sonographic examination of lateral epicondylitis (Connell et al., 2001)</p>                                                                                                                                                                                                                                                                     |
| III-3              | Diagnostic case-control study                                                                                                       | None                                                                                                                                                                                                                                                                                                                                                                                                                                                                                                                                  |
| IV                 | Study of diagnostic yield (with no reference standard)                                                                              | None                                                                                                                                                                                                                                                                                                                                                                                                                                                                                                                                  |

Key: NHMRC, National Health and Medical Research Council; SR, systematic review



## Appendix 5. STARD Grades

|       |                                  | Obradov<br>and<br>Anderson | Toprak<br>et al. | Lee<br>et al. | Zeisig<br>et al. | Noh<br>et al. | de<br>Zordo<br>et al. | Khoury<br>and<br>Cardinal | Tarhan<br>et al. | du<br>Toit et<br>al. | Zeisig<br>et al. | Struijs<br>et al. | Levin<br>et al. | Miller<br>et al. | Connell<br>et al. | Maffulli<br>et a. |
|-------|----------------------------------|----------------------------|------------------|---------------|------------------|---------------|-----------------------|---------------------------|------------------|----------------------|------------------|-------------------|-----------------|------------------|-------------------|-------------------|
|       |                                  | 2012                       | 2012             | 2011          | 2010             | 2010          | 2009                  | 2009                      | 2009             | 2008                 | 2006             | 2005              | 2005            | 2002             | 2001              | 1990              |
| STARD |                                  |                            |                  |               |                  |               |                       |                           |                  |                      |                  |                   |                 |                  |                   |                   |
| 1     | Title                            | 0                          | 1                | 0             | 0                | 0             | 0                     | 0                         | 0                | 1                    | 0                | 0                 | 1               | 1                | 0                 | 0                 |
| 2     | Rationale                        | 0                          | 1                | 1             | 0                | 1             | 1                     | 1                         | 0                | 1                    | 1                | 0                 | 1               | 1                | 1                 | 1                 |
| 3     | Eligibility criteria             | 1                          | 1                | 1             | 1                | 1             | 1                     | 0                         | 1                | 1                    | 1                | 1                 | 0               | 1                | 1                 | 1                 |
| 4     | Basis of recruitment             | 1                          | 1                | 1             | 1                | 1             | 1                     | 1                         | 1                | 1                    | 1                | 1                 | 0               | 1                | 1                 | 1                 |
| 5     | Consecutive recruitment?         | 1                          | 0                | 1             | 0                | 1             | 1                     | 1                         | 1                | 1                    | 1                | 1                 | 0               | 0                | 1                 | 0                 |
| 6     | Data collection process          | 1                          | 1                | 1             | 1                | 1             | 1                     | 1                         | 1                | 1                    | 1                | 1                 | 1               | 1                | 1                 | 1                 |
| 7     | Reference standard and rationale | 1                          | 1                | 1             | 0                | 0             | 1                     | 0                         | 0                | 1                    | 0                | 0                 | 1               | 1                | 0                 | 0                 |
| 8     | Technical specifications         | 1                          | 1                | 1             | 1                | 1             | 1                     | 1                         | 1                | 1                    | 1                | 1                 | 1               | 1                | 1                 | 1                 |
| 9     | Definition of results            | 1                          | 1                | 1             | 1                | 1             | 1                     | 1                         | 1                | 1                    | 1                | 1                 | 1               | 1                | 1                 | 1                 |
| 10    | Training                         | 1                          | 1                | 1             | 1                | 1             | 1                     | 1                         | 1                | 1                    | 1                | 1                 | 1               | 1                | 1                 | 0                 |
| 11    | Blinding                         | 1                          | 0                | 1             | 1                | 1             | 1                     | 0                         | 1                | 1                    | 1                | 1                 | 1               | 1                | 0                 | 1                 |

Key: STARD, Standards for Reporting of Diagnostic Accuracy; 0, poorly addressed or not addressed; 1, well covered or adequately addressed

|              |                                   | Obradov<br>and<br>Anderson<br>2012 | Toprak<br>et al.<br>2012 | Lee<br>et al.<br>2011 | Zeisig<br>et al.<br>2010 | Noh<br>et al.<br>2010 | de<br>Zordo<br>et al.<br>2009 | Khoury<br>and<br>Cardinal<br>2009 | Tarhan<br>et al.<br>2009 | du<br>Toit et<br>al.<br>2008 | Zeisig<br>et al.<br>2006 | Struijs<br>et al.<br>2005 | Levin<br>et al.<br>2005 | Miller<br>et al.<br>2002 | Connell<br>et al.<br>2001 | Maffulli<br>et a.<br>1990 |
|--------------|-----------------------------------|------------------------------------|--------------------------|-----------------------|--------------------------|-----------------------|-------------------------------|-----------------------------------|--------------------------|------------------------------|--------------------------|---------------------------|-------------------------|--------------------------|---------------------------|---------------------------|
| <b>STARD</b> |                                   |                                    |                          |                       |                          |                       |                               |                                   |                          |                              |                          |                           |                         |                          |                           |                           |
| 12           | Statistics used                   | 1                                  | 1                        | 1                     | 1                        | 0                     | 1                             | 0                                 | 1                        | 1                            | 0                        | 1                         | 1                       | 1                        | 0                         | 0                         |
| 13           | Reliability tests                 | 0                                  | 0                        | 1                     | 0                        | 0                     | 0                             | 0                                 | 0                        | 0                            | 0                        | 0                         | 1                       | 0                        | 0                         | 0                         |
| 14           | Recruitment period                | 1                                  | 0                        | 1                     | 0                        | 1                     | 0                             | 0                                 | 0                        | 1                            | 0                        | 1                         | 1                       | 0                        | 1                         | 0                         |
| 15           | Demographics                      | 1                                  | 1                        | 1                     | 1                        | 1                     | 1                             | 1                                 | 1                        | 1                            | 1                        | 1                         | 1                       | 1                        | 1                         | 1                         |
| 16           | Drop outs                         | 1                                  | 1                        | 1                     | 1                        | 1                     | 1                             | 1                                 | 1                        | 1                            | 1                        | 1                         | 1                       | 1                        | 0                         | 1                         |
| 17           | Time interval                     | 0                                  | 1                        | 0                     | 0                        | 0                     | 1                             | 0                                 | 0                        | 1                            | 0                        | 0                         | 0                       | 0                        | 0                         | 0                         |
| 18           | Severity of symptoms              | 0                                  | 0                        | 0                     | 0                        | 1                     | 1                             | 0                                 | 1                        | 0                            | 0                        | 0                         | 0                       | 0                        | 0                         | 0                         |
| 19           | Cross tabulation                  | 1                                  | 1                        | 1                     | 0                        | 1                     | 1                             | 0                                 | 0                        | 1                            | 1                        | 1                         | 0                       | 0                        | 0                         | 0                         |
| 20           | Adverse events                    | 0                                  | 0                        | 0                     | 0                        | 0                     | 0                             | 0                                 | 0                        | 1                            | 0                        | 0                         | 0                       | 0                        | 0                         | 0                         |
| 21           | Diagnostic Accuracy<br>and 95% CI | 1                                  | 0                        | 1                     | 0                        | 0                     | 0                             | 0                                 | 0                        | 1                            | 0                        | 0                         | 1                       | 0                        | 0                         | 0                         |
| 22           | Drop-outs                         | 1                                  | 1                        | 1                     | 1                        | 1                     | 1                             | 1                                 | 1                        | 1                            | 1                        | 1                         | 1                       | 1                        | 0                         | 1                         |
| 23           | Subgroup analysis                 | 0                                  | 1                        | 0                     | 0                        | 0                     | 0                             | 0                                 | 1                        | 1                            | 0                        | 0                         | 0                       | 0                        | 0                         | 0                         |
| 24           | Estimates for<br>reliability      | 0                                  | 0                        | 1                     | 0                        | 0                     | 0                             | 0                                 | 0                        | 0                            | 0                        | 0                         | 1                       | 0                        | 0                         | 0                         |
| 25           | Clinical applicability            | 1                                  | 1                        | 1                     | 1                        | 1                     | 1                             | 1                                 | 1                        | 1                            | 1                        | 1                         | 1                       | 1                        | 1                         | 1                         |

Key: STARD, Standards for Reporting of Diagnostic Accuracy; 0, poorly addressed or not addressed; 1, well covered or adequately addressed

## Appendix 6. Quality Assessment for Diagnostic Accuracy Studies (QUADAS) scores

| Authors, Year                             | 1 | 2 | 3 | 4 | 5 | 6 | 7 | 8 | 9 | 10 | 11 | 12 | 13 | 14 |
|-------------------------------------------|---|---|---|---|---|---|---|---|---|----|----|----|----|----|
| Obradov and Anderson (2012) <sup>26</sup> | N | Y | Y | ? | Y | Y | Y | Y | N | Y  | Y  | N  | ?  | Y  |
| Toprak et al. (2012) <sup>27</sup>        | N | Y | Y | Y | Y | Y | Y | Y | N | ?  | Y  | ?  | ?  | Y  |
| Lee et al. (2011) <sup>28</sup>           | N | Y | Y | N | Y | Y | Y | Y | N | Y  | Y  | N  | ?  | ?  |
| Zeisig et al. (2010) <sup>34</sup>        | N | N | Y | Y | Y | Y | N | Y | N | Y  | N  | N  | ?  | Y  |
| Noh et al. (2010) <sup>18</sup>           | N | Y | Y | ? | Y | Y | Y | Y | N | N  | Y  | Y  | ?  | Y  |
| de Zordo et al. (2009) <sup>16</sup>      | N | Y | Y | Y | Y | Y | Y | Y | N | Y  | Y  | N  | ?  | Y  |
| Khoury and Cardinal (2009) <sup>17</sup>  | N | N | N | ? | Y | Y | Y | Y | N | ?  | Y  | ?  | ?  | Y  |
| Tarhan et al. (2009) <sup>35</sup>        | N | Y | Y | ? | Y | Y | Y | Y | N | Y  | Y  | N  | ?  | Y  |
| du Toit et al. (2008) <sup>31</sup>       | N | Y | Y | Y | Y | Y | Y | Y | N | Y  | Y  | N  | ?  | Y  |
| Zeisig et al. (2006) <sup>29</sup>        | N | Y | Y | Y | Y | Y | Y | Y | N | Y  | Y  | N  | ?  | Y  |
| Struijs et al. (2005) <sup>25</sup>       | N | Y | Y | ? | Y | Y | Y | Y | N | Y  | Y  | N  | Y  | Y  |
| Levin et al. (2005) <sup>32</sup>         | N | Y | Y | ? | Y | Y | Y | Y | N | Y  | Y  | N  | ?  | Y  |
| Miller et al. (2002) <sup>33</sup>        | N | N | Y | N | Y | Y | Y | Y | N | Y  | Y  | N  | ?  | Y  |
| Connell et al. (2001) <sup>30</sup>       | N | N | ? | Y | Y | Y | Y | Y | N | ?  | Y  | ?  | ?  | N  |
| Maffulli et al. (1990) <sup>36</sup>      | N | N | Y | ? | Y | Y | Y | N | N | Y  | Y  | N  | ?  | Y  |

Key: N, No; QUADAS, Quality Assessment for Diagnostic Accuracy Studies; Y, Yes; ?, undetermined

## Appendix 7. Description of diagnostic studies

| Author, Year, Country                                       | Selection of patients                                                                                                                                                                                                                            | Source of patients                                                    | Recruitment                | Basis for recruitment                             | Reference standard                                   | Reader/blinding        | MSUS machine/frequency of transducer head                                                           |
|-------------------------------------------------------------|--------------------------------------------------------------------------------------------------------------------------------------------------------------------------------------------------------------------------------------------------|-----------------------------------------------------------------------|----------------------------|---------------------------------------------------|------------------------------------------------------|------------------------|-----------------------------------------------------------------------------------------------------|
| Obradov and Anderson (2012) <sup>26</sup> , The Netherlands | <p><i>Inclusion Criteria</i><br/>           (+)LE symptoms for 6 months<br/>           (+)sonographic probe induce tenderness</p> <p><i>Exclusion Criteria</i><br/>           (+)previous surgery<br/>           (+)systematic joint disease</p> | Hospital                                                              | Consecutive, retrospective | Presenting symptoms                               | Sonographic probe induced tenderness                 | 2 Radiologists/blinded | ATL 5000, Philips, The Netherlands/5-12 MHz linear-array transducer                                 |
| Toprak et al. (2012) <sup>27</sup> , Turkey                 | <p><i>Inclusion Criteria</i><br/>           (+)tenderness on (+)Cozen</p> <p><i>Exclusion Criteria</i><br/>           (+) NSAIDs within 3 weeks prior to the study<br/>           (+) surgery<br/>           (+) acute trauma</p>                | Hospitals Referred by physical rehabilitation and medical specialists | Consecutive, prospective   | Presenting symptoms<br>Results from previous test | Tenderness on lateral epicondyle<br>(+) Cozen's test | Radiologist/blinded    | General electric medical systems, Milwaukee, Wisconsin, USA, 12 MHz (10-14 MHz) probes in real time |

| Author, Year, Country                   | Selection of patients                                                                                                                                                                                                                                                                                                                                                                                                                                               | Source of patients                                             | Recruitment                                                   | Basis for recruitment                                         | Reference standard                                                                                                                                                             | Reader/blinding     | MSUS machine/frequency of transducer head                  |
|-----------------------------------------|---------------------------------------------------------------------------------------------------------------------------------------------------------------------------------------------------------------------------------------------------------------------------------------------------------------------------------------------------------------------------------------------------------------------------------------------------------------------|----------------------------------------------------------------|---------------------------------------------------------------|---------------------------------------------------------------|--------------------------------------------------------------------------------------------------------------------------------------------------------------------------------|---------------------|------------------------------------------------------------|
| Lee et al. (2011) <sup>28</sup> , Korea | <p><i>Inclusion Criteria:</i><br/>           (+)hx of LE<br/>           (+)s/sx of LE<br/>           (+) provisional diagnosis of LE</p> <p><i>Exclusion Criteria:</i><br/>           (+)steroid injection &lt; 3 weeks prior to MSUS<br/>           (+)hx of acute trauma or previous surgery</p> <p><i>Healthy Group:</i><br/>           (-)S/Sx of LE<br/>           (-)hx of CTD<br/>           (-)inflammatory arthritis<br/>           (-)hx elbow injury</p> | <p>Local community</p> <p>Referred by orthopaedic surgeons</p> | <p>Presenting symptoms</p> <p>Results from previous tests</p> | <p>Presenting symptoms</p> <p>Results from previous tests</p> | <p>Tenderness on lateral epicondyle<br/>           (+) Cozen's tests<br/>           Reduced grip strength<br/>           (+) chair-test<br/>           (+) coffee-cup test</p> | Radiologist/blinded | ATL HDI 5000 UI-22 Philips Healthcare linear array, 12 MHz |

| Author, Year, Country                          | Selection of patients                                                                                                                                                                                                                                 | Source of patients                                           | Recruitment                  | Basis for recruitment                                         | Reference standard                                                                                                                     | Reader/blinding                | MSUS machine/frequency of transducer head                                                                                                                                                                                                |
|------------------------------------------------|-------------------------------------------------------------------------------------------------------------------------------------------------------------------------------------------------------------------------------------------------------|--------------------------------------------------------------|------------------------------|---------------------------------------------------------------|----------------------------------------------------------------------------------------------------------------------------------------|--------------------------------|------------------------------------------------------------------------------------------------------------------------------------------------------------------------------------------------------------------------------------------|
| Zeisig et al. (2010) <sup>34</sup> , Sweden    | <p><i>Inclusion Criteria:</i><br/>           (+)tenderness<br/>           (+)Cozen<br/>           (+)high blood flow in CEO</p> <p><i>Exclusion Criteria:</i><br/>           (+) RN compression</p>                                                   | <p>Sports Medicine Unit</p> <p>Referred by hand surgeons</p> | Non-consecutive, prospective | <p>Presenting symptoms</p> <p>Results from previous tests</p> | (+)tenderness on lateral epicondyle<br>(+)Cozen<br>(+)increased blood flow in CEO                                                      | Radiologist/blinded            | <p>High resolution grey-scale US and CD, Accuson Sequoia 512</p> <p>8-13 MHz</p>                                                                                                                                                         |
| Noh et al. (2010) <sup>18</sup> , Korea        | <p><i>Inclusion Criteria:</i><br/>           (+)LE &gt;3 weeks<br/>           (+)VAS at rest &gt;4<br/>           (+) conservative medical treatment<br/>           (-)hx of steroid injection<br/>           (-)hx of PT</p>                         | Not indicated                                                | Consecutive, prospective     | Presenting symptoms                                           | (+)lateral elbow pain (> 3 weeks)<br>(+)tenderness on lateral epicondyle<br>(+)Cozen's test<br>(+)sonographic probe induced tenderness | Orthopedic surgeon/not blinded | Accuvix XQ, Medison, Korea                                                                                                                                                                                                               |
| De Zordo et al. (2009) <sup>16</sup> , Austria | <p><i>Inclusion Criteria:</i><br/>           (+)LE Sx</p> <p><i>Exclusion Criteria:</i><br/>           (+)hx of tendon rupture<br/>           (+)hx of systematic inflammatory D/O</p> <p><i>Healthy group:</i><br/>           (-) LE examination</p> | Not indicated                                                | Consecutive, prospective     | Presenting symptoms                                           | (+)lateral elbow pain<br>(+)tenderness on lateral epicondyle<br>(+)Cozen<br>(+)reduced grip strength                                   | 2 Radiologists: blinded        | <p>RTSE scanner<br/>           EUB 9000, EUP-154M, Hitachi Medical<br/>           6-13 MHz</p> <p>Power Doppler MSUS<br/>           MyLab 90 scanner, Esaote<br/>           linear array (LA 435, Esaote)<br/>           at 6-18 MHz</p> |

| Author, Year, Country                              | Selection of patients                                                                                                                                                                                                                                                               | Source of patients | Recruitment              | Basis for recruitment | Reference standard                                                                                          | Reader/blinding           | MSUS machine/frequency of transducer head                                  |
|----------------------------------------------------|-------------------------------------------------------------------------------------------------------------------------------------------------------------------------------------------------------------------------------------------------------------------------------------|--------------------|--------------------------|-----------------------|-------------------------------------------------------------------------------------------------------------|---------------------------|----------------------------------------------------------------------------|
| Khoury and Cardinal, (2009) <sup>17</sup> , Canada | <i>Inclusion Criteria:</i><br>(+)MSUS findings<br>(+)unilateral extensor tendinopathy                                                                                                                                                                                               | Not indicated      | Consecutive, prospective | Presenting symptoms   | Clinical diagnosis of LE                                                                                    | Radiologist/not indicated | iU22 system, Philips Medical Systems<br><br>15 MHz hockey stick transducer |
| Tarhan et al. (2009) <sup>35</sup> , Turkey        | <i>Inclusion Criteria:</i><br>(+)intermittent pain for 3 weeks<br>(+)tenderness 2cm of lateral epicondyle<br>(+)Cozen<br>(+)Maudsley<br><br><i>Exclusion Criteria:</i><br>(+)hx elbow fracture<br>(+)congenital or acquired elbow deformities<br>(+)inflammatory rheumatic disorder | Outpatient         | Consecutive, prospective | Presenting symptoms   | (+)lateral elbow pain (at least 3 weeks)<br>(+)Cozen<br>(+)Maudsley<br>(+)exacerbated pain vs constant pain | Radiologist/blinded       | Sonoline G50, Siemens, Seattle, WA, USA<br><br>linear array, 8-12 MHz      |

| Author, Year, Country                           | Selection of patients                                                                                                                                                                                                                                                                                                                                                                                                                                                                                                                                                               | Source of patients                                                                 | Recruitment              | Basis for recruitment                                 | Reference standard                                                                                                               | Reader/blinding     | MSUS machine/frequency of transducer head                                                                                                  |
|-------------------------------------------------|-------------------------------------------------------------------------------------------------------------------------------------------------------------------------------------------------------------------------------------------------------------------------------------------------------------------------------------------------------------------------------------------------------------------------------------------------------------------------------------------------------------------------------------------------------------------------------------|------------------------------------------------------------------------------------|--------------------------|-------------------------------------------------------|----------------------------------------------------------------------------------------------------------------------------------|---------------------|--------------------------------------------------------------------------------------------------------------------------------------------|
| du Toit et al. (2008) <sup>31</sup> , Australia | <p><i>Inclusion Criteria:</i><br/>           (+) lat elbow pain &gt; 3mos.<br/>           (+)Cozen<br/>           (+) pain when gripping<br/>           (+)tenderness on lateral epicondyle</p> <p><i>Exclusion Criteria:</i><br/>           (+)pain &lt;3 mos.<br/>           (+)LOM of elbow<br/>           (+)upper neurological S/Sx<br/>           (+)corticosteroid injection &lt;3 mos.</p> <p><i>Healthy group:</i><br/>           (-)current or past Hx of lateral elbow pain<br/>           (-)tenderness<br/>           (+)full ROM<br/>           (+)pain-free grip</p> | Private clinics referred by general practitioners, sports physicians self-referred | Consecutive, prospective | Presenting symptom<br><br>Results from previous tests | (+)lateral elbow pain (>3 months)<br>(+)tenderness on lateral epicondyle<br>(+)Cozen<br>(+) Maudsley<br>(+)reduced grip strength | Sonographer/blinded | Philips IU22 US machine<br>Grey-scale: 17-5 MHz<br>Doppler: Pulsed repetition frequency: 1000 Hz<br>Wall filter: 75 Hz<br>Colour gain: 86% |



| Author, Year, Country                                 | Selection of patients                                                                                                                                                                                                                                                                                                                                                             | Source of patients                                      | Recruitment                    | Basis for recruitment                                  | Reference standard                                                               | Reader/blinding      | MSUS machine/frequency of transducer head                               |
|-------------------------------------------------------|-----------------------------------------------------------------------------------------------------------------------------------------------------------------------------------------------------------------------------------------------------------------------------------------------------------------------------------------------------------------------------------|---------------------------------------------------------|--------------------------------|--------------------------------------------------------|----------------------------------------------------------------------------------|----------------------|-------------------------------------------------------------------------|
| Zeisig et al. (2006) <sup>29</sup> , Sweden           | <p><i>Inclusion Criteria:</i><br/>           (+)tenderness<br/>           (+)Cozen</p> <p><i>Exclusion Criteria:</i><br/>           (+)synovitis in proximal RU joint<br/>           (+)RN Entrapment<br/>           (+)arthritis</p>                                                                                                                                             | Public hospital<br><br>Referred by general practitioner | Consecutive, prospective       | Presenting symptoms<br><br>Results from previous tests | (+)tenderness on lateral epicondyle<br>(+)Cozen                                  | Radiologist/blinded  | Acuson Sequoia 512<br>8-13 MHz<br><br>Colour Doppler velocity technique |
| Struijs et al. (2005) <sup>25</sup> , The Netherlands | <p><i>Inclusion criteria:</i><br/>           (+)clinical diagnosis of LE<br/>           (+)tenderness<br/>           (+)Cozen<br/>           (+)pain not &lt;6 weeks</p> <p><i>Exclusion Criteria:</i><br/>           (+)bilateral LE<br/>           (+) dec pain &lt;2wks<br/>           (+) treatment in previous 6 mos.<br/>           Inability to fill out questionnaire</p> | Outpatient                                              | Non consecutive, retrospective | Presenting symptoms                                    | (+)clinical diagnosis of LE<br>(+)tenderness<br>(+)Cozen<br>(+)pain not <6 weeks | Sonographer/ blinded | SSD 900 Aloka<br><br>7.5 MHz linear array                               |

| Author, Year, Country                              | Selection of patients                                                                                                                                                                                 | Source of patients                    | Recruitment                    | Basis for recruitment                                         | Reference standard                                                                                                                                | Reader/blinding                     | MSUS machine/frequency of transducer head                                                                                                                                                           |
|----------------------------------------------------|-------------------------------------------------------------------------------------------------------------------------------------------------------------------------------------------------------|---------------------------------------|--------------------------------|---------------------------------------------------------------|---------------------------------------------------------------------------------------------------------------------------------------------------|-------------------------------------|-----------------------------------------------------------------------------------------------------------------------------------------------------------------------------------------------------|
| Levin et al. (2005) <sup>32</sup> , United States  | <p><i>Inclusion Criteria:</i><br/>Referred by the sports medicine physician</p> <p><i>Healthy Group:</i><br/>Non-tender elbows<br/>No history of elbow problems<br/>Did not undergo clinical exam</p> | Referred by Sports medicine physician | Non-consecutive, retrospective | <p>Presenting symptoms</p> <p>Results from previous tests</p> | (+)tenderness on lateral epicondyle<br>(+)Cozen                                                                                                   | 2 Radiologists/blinded              | <p>Siemens Elegra, Siemens Medical Systems, Issaquah, Wash; or Philips HDI, 5000, Philips Medical Systems, Bothell, Wash</p> <p>Multifrequency linear array with peak frequency of 12 or 13 MHz</p> |
| Miller et al. (2002) <sup>33</sup> , United States | <p><i>Inclusion Criteria:</i><br/>(+)elbow pain<br/>(+)tenderness<br/>(+)Cozen<br/>(+)dx by orthopaedic surgeon</p> <p><i>Healthy group:</i><br/>No history of pain</p>                               | Referred by orthopaedic surgeons      | Non-consecutive, retrospective | <p>Presenting symptoms</p> <p>Results from previous tests</p> | (+)lateral elbow pain<br>(+)tenderness on lateral epicondyle<br>(+)Cozen<br>(+)pain when gripping<br>(+)surgical and histopathologic confirmation | Radiologist and body imager/blinded | HDI 3000 US scanner (Advanced Technology Laboratories, Bothell, WA linear array or compact transducer, 5-10 MHz                                                                                     |

| Author, Year, Country                           | Selection of patients                                       | Source of patients                                                               | Recruitment                 | Basis for recruitment          | Reference standard                               | Reader/blinding                           | MSUS machine/frequency of transducer head      |
|-------------------------------------------------|-------------------------------------------------------------|----------------------------------------------------------------------------------|-----------------------------|--------------------------------|--------------------------------------------------|-------------------------------------------|------------------------------------------------|
| Connell et al. (2001) <sup>30</sup> , Australia | <i>Inclusion Criteria:</i> Patients with lateral elbow pain | Referred by orthopaedic surgeons, rheumatologists and sports medicine physicians | Results from previous tests | Consecutive, prospective       | Clinical diagnosis of LE                         | Sonographer and radiologist/not indicated | HDI 3000, ATL, Bothell, WA 10 MHz              |
| Maffulli et al. (1990) <sup>36</sup> , Italy    |                                                             | Tennis players                                                                   | Presenting symptoms         | Non-consecutive, retrospective | (+)lateral elbow pain<br>(+)Cozen<br>(+)Maudsley | 2 Radiologists/blinded                    | Linear 7 MHz probe and a sector of 5 MHz probe |

Key: CEO, common extensor origin; CTD, connective tissue disorder; dec, decreased; D/O, disorder; dx, diagnosed; Hx, history; LE, lateral epicondylalgia; MHz, Megahertz; MSUS, musculoskeletal ultrasound; mo(s), month(s); PT, physical therapy; RN, Radial Nerve; RTSE, Real-time Sonoelastography; RU, radioulnar; S/Sx, signs and symptoms; Sx, symptoms; USA, United States of America; VAS, Visual Analogue Scale

## Appendix 7. Characteristics of studied population

| Author, Year, Country                                       | Number and gender of LE participants | Age of LE participants (mean, SD, range) in years | Number of symptomatic elbows               | Duration of symptoms      | Number and gender of healthy participants | Age of healthy participants (mean, SD, range) in years | Number of asymptomatic elbows |
|-------------------------------------------------------------|--------------------------------------|---------------------------------------------------|--------------------------------------------|---------------------------|-------------------------------------------|--------------------------------------------------------|-------------------------------|
| Obradov and Anderson (2012) <sup>26</sup> , The Netherlands | 43 (23 males, 20 female)             | 47(7.7)(NR)                                       | 49 (6 bilateral)                           | At least 6 mos.           | 5 (2 male, 3 female)                      | 36(8.7)(NR)                                            | 10 (healthy)                  |
| Toprak et al. (2012) <sup>27</sup> , Turkey                 | 164 (54 male, 110 female)            | 43(NR)(19-66)                                     | 248 (84 bilateral, 144 dominant)           | Categorised as chronic    | 80 (20 male, 60 female)                   | 39(NR)(17-71)                                          | 160 (healthy)                 |
| Lee et al. (2011) <sup>28</sup> , Korea                     | 48 (11 male, 37 female)              | 48.3(NR)(34-66)                                   | 51 (3 with bilateral affectations)         | 3 months (2 wks - 6 mos.) | 63 (15 male, 48 female)                   | 48.3(NR)(39-63)                                        | 63 (healthy elbows)           |
| Zeisig et al., (2010) <sup>34</sup> , Sweden                | 25 (12 male, 13 female)              | 46(NR)(27-66)                                     | 28 (3 with bilateral affectations)         | 18 mos. (3-60 mos.)       | NA                                        | NA                                                     | N/A                           |
| Noh et al. (2009) <sup>18</sup> , Korea                     | 27 (12 male, 15 female)              | 44*(NR)(37-59)                                    | 27 (22 dominant, no bilateral affectation) | 8.7 weeks (3-18 weeks)    | 27 (13 male, 14 female)                   | 43*(NR)(37-59)                                         | 27 (healthy)                  |

| Author, Year, Country                                 | Number and gender of LE participants | Age of LE participants (mean, SD, range) in years | Number of symptomatic elbows                   | Duration of symptoms (mean, SD, range) | Number and gender of healthy participants | Age of healthy participants (mean, SD, range) in years | Number of asymptomatic elbows                  |
|-------------------------------------------------------|--------------------------------------|---------------------------------------------------|------------------------------------------------|----------------------------------------|-------------------------------------------|--------------------------------------------------------|------------------------------------------------|
| De Zordo et al. (2009) <sup>16</sup> , Austria        | 32 (10 male, 22 female)              | 52.6(NR)(38-70)                                   | 38 (6 with bilateral affectations)             | 9 (24.36)(6-120) mos.                  | 28 (11 male, 17 female)                   | 43.6(NR)(24-89)                                        | 44 (12 asymptomatic elbows, 32 healthy elbows) |
| Khoury and Cardinal, (2009) <sup>17</sup> , Canada    | 8 (1 male, 7 female)                 | 45(NR)(NR)                                        | 8 (no bilateral affectation)                   | Not indicated                          | NA                                        | NA                                                     | 7 (asymptomatic elbows)                        |
| Tarhan et al. (2009) <sup>35</sup> , Turkey           | 52 (13 male, 39 female)              | Grp1:<br>49.8(9.6)NR<br>Grp2:<br>44.8(8.9)NR      | 52 (49 dominant, no bilateral affectations)    | 8.2*(NR) (1-72) mos.                   | NA                                        | NA                                                     | NA                                             |
| du Toit et al. (2008) <sup>31</sup> , Australia       | 25 (15 male, 10 female)              | 50(9)NR                                           | 32 (11 dominant, 7 with bilateral affectation) | 10(NR)(3-120) mos.                     | 19 (9 male, 10 female)                    | 45(10)(NR)                                             | 56 (18 asymptomatic and 38 healthy elbows)     |
| Zeisig et al. (2006) <sup>29</sup> , Sweden           | 17 (7 male, 10 female)               | 45(NR)(NR)                                        | 22 (5 with bilateral affectations)             | 18 (NR)(NR) mos.                       | 11 (6 male, 5 female)                     | 45(NR)(NR)                                             | 22 (healthy elbows)                            |
| Struijs et al. (2005) <sup>25</sup> , The Netherlands | 57 (29 male, 28 female)              | 45.5(12.8)(NR)                                    | 57 (41 dominant, no bilateral affectation)     | 17(11.3)(NR) wks                       | NA                                        | NA                                                     | 57 (asymptomatic elbows)                       |

| Author, Year, Country                              | Number and gender of LE participants | Age of LE participants (mean, SD, range) in years | Number of symptomatic elbows       | Duration of symptoms                                                 | Number and gender of healthy participants | Age of healthy participants (mean, SD, range) in years | Number of asymptomatic elbows           |
|----------------------------------------------------|--------------------------------------|---------------------------------------------------|------------------------------------|----------------------------------------------------------------------|-------------------------------------------|--------------------------------------------------------|-----------------------------------------|
| Levin et al. (2005) <sup>32</sup> , United States  | 22 (10 male, 12 female)              | 46(NR)(30-59)                                     | 25 (3 with bilateral affectations) | Not indicated                                                        | 10 (6 male, 4 female)                     | 29.6(NR)( 22-38)                                       | 32 (19 asymptomatic, 13 healthy elbows) |
| Miller et al. (2002) <sup>33</sup> , United States | 8 (5 male, 3 female)                 | 46(NR)(38-63)                                     | 8 (no bilateral affectation)       | 7.6 mos. (NR)(3 wks-2 yrs), included those with medial epicondylitis | 6 (3 males, 3 females)                    | 29(NR)(25-30)                                          | 20 (8 asymptomatic, 12 healthy)         |
| Connell et al. (2001) <sup>30</sup> , Australia    | 76 (51 male, 25 female)              | 45.6(NR)(21-67)                                   | 72 (1 bilateral affectation)       | 7.1 mos(NR)(1 day to 9 yrs)                                          | 10 (6 male, 4 female)                     | 36.4(NR)(NR)                                           | 10 (healthy)                            |
| Maffulli et al. (1990) <sup>36</sup> , Italy       | 41 (39 male, 2 female)               | 24.3(7.3)(16-36)                                  | 41                                 | 2.2 mos(NR)(17 days-9.8 months)                                      | NA                                        | NA                                                     | N/A                                     |

Key: grp, group; mo(s), month(s); LE, lateral epicondylgia; NA, not applicable; NR, not reported; SD, standard deviation; wk(s), week(s); yr(s), year(s); (+), positive; (-), negative; \*, reported as median

## Appendix 8. Sensitivity and Specificity of MSUS findings in elbows LE

*Key:*

Asx, asymptomatic

Calc, calcifications

CSA, cross sectional area

Ext, external

Int, internal

LE, Lateral Epicondylalgia

NA, not applicable

NR, not reported

NSx, non-symptomatic

SnS, sensitivity

SpC, specificity

\* Patients with unilateral symptoms only were included for examinations of CEO thickness.

#non-symptomatic elbows of healthy participants

\$ combined asymptomatic elbows of participants with LE and non-symptomatic elbows of healthy participants

^considered only those patients who received local corticosteroid injections

@asymptomatic elbows of participants with LE

| Authors                                                                  | N=Symptomatic elbows | SnS                 | N=Asx or NSx elbows    | SpC                 |
|--------------------------------------------------------------------------|----------------------|---------------------|------------------------|---------------------|
| <b>MSUS techniques</b>                                                   |                      |                     |                        |                     |
| <b>Gray-scale ultrasonography</b>                                        |                      |                     |                        |                     |
| Lee et al. (2010) <sup>28</sup>                                          | 51                   | 0.76<br>(0.63-0.87) | 63 <sup>#</sup>        | 0.76<br>(0.64-0.86) |
| de Zordo et al. (2009) <sup>16</sup>                                     | 38                   | 0.95<br>(0.89-0.98) | 44 <sup>§</sup>        | 0.89<br>(0.82-0.93) |
| du Toit et al. (2008) <sup>31</sup>                                      | Variable*            | 0.81<br>(0.64-0.93) | Variable* <sup>§</sup> | 0.63<br>(0.49-0.75) |
| Levin et al. (2005) <sup>32</sup> (first reading)                        | 75                   | 0.81<br>(0.71-0.89) | 96 <sup>§</sup>        | 0.46<br>(0.36-0.56) |
| Levin et al. (2005) <sup>32</sup> (second reading)                       | 75                   | 0.75<br>(0.63-0.84) | 96 <sup>§</sup>        | 0.42<br>(0.32-0.52) |
| Struijs et al. (2005) <sup>25</sup>                                      | 57                   | 0.75<br>(0.62-0.86) | 57 <sup>@</sup>        | 0.81<br>(0.68-0.90) |
| <b>Gray scale ultrasonography + Power Doppler ultrasonography</b>        |                      |                     |                        |                     |
| Obradov and Anderson (2012) <sup>26</sup> (including hypoechoic regions) | 49                   | 1.00<br>(0.93-1.00) | 10 <sup>#</sup>        | 0.90<br>(0.55-1.00) |
| Obradov and Anderson (2012) <sup>26</sup> (excluding hypoechoic regions) | 49                   | 0.92<br>(0.81-0.97) | 10 <sup>#</sup>        | 0.90<br>(0.55-1.00) |
| Toprak et al. (2012) <sup>27</sup>                                       | 248                  | 0.54<br>(0.48-0.60) | 160 <sup>#</sup>       | 0.88<br>(0.82-0.93) |
| du Toit et al. (2008) <sup>31</sup>                                      | Variable*            | 0.97<br>(0.84-1.00) | Variable* <sup>§</sup> | 0.61<br>(0.47-0.74) |
| <b>Real-time sonoelastography</b>                                        |                      |                     |                        |                     |
| de Zordo et al. (2009) <sup>16</sup>                                     | 38                   | 1.00<br>(0.91-1.00) | 44 <sup>§</sup>        | 0.89<br>(0.75-0.96) |
| <b>MSUS findings</b>                                                     |                      |                     |                        |                     |
| <b>Hypoechoogenicity</b>                                                 |                      |                     |                        |                     |
| Obradov and Anderson (2012) <sup>26</sup>                                | 49                   | 0.86<br>(0.73-0.94) | 10 <sup>#</sup>        | 1.00<br>(0.69-1.00) |
| Lee et al. (2011) <sup>28</sup>                                          | 51                   | 0.35<br>(0.22-0.50) | 63 <sup>#</sup>        | 0.94<br>(0.85-0.98) |
| De Zordo et al. (2009) <sup>16</sup> (anterior section)                  | 38                   | 0.50<br>(0.33-0.67) | 44 <sup>§</sup>        | 1.00<br>(0.92-1.00) |
| De Zordo et al. (2009) <sup>16</sup> (middle section)                    | 38                   | 0.89<br>(0.75-0.97) | 44 <sup>§</sup>        | 0.89<br>(0.75-0.96) |
| De Zordo et al. (2009) <sup>16</sup> (posterior section)                 | 38                   | 0.53<br>(0.36-0.69) | 44 <sup>§</sup>        | 1.00<br>(0.92-1.00) |
| Noh et al. (2009) <sup>18</sup>                                          | 27                   | 0.59<br>(0.39-0.78) | 27 <sup>#</sup>        | 0.85<br>(0.66-0.96) |
| Khoury and Cardinal (2009) <sup>17</sup>                                 | 8                    | 1.00<br>(0.63-1.00) | 8 <sup>@</sup>         | NR                  |
| Zeisig et al. (2006) <sup>29</sup>                                       | 22                   | 1.00<br>(0.85-1.00) | 22 <sup>#</sup>        | 1.00<br>(0.85-1.00) |



0

| Authors                                              | N=Symptomatic elbows | SnS                 | N=Asx or NSx elbows | Spc                 |
|------------------------------------------------------|----------------------|---------------------|---------------------|---------------------|
| <b>Neovascularity</b>                                |                      |                     |                     |                     |
| du Toit et al. (2008) <sup>31</sup>                  | 32                   | 0.81<br>(0.64-0.93) | 56                  | 0.98<br>(0.90-1.00) |
| Zeisig et al. (2006) <sup>28</sup>                   | 22                   | 0.95<br>(0.77-1.00) | 22 <sup>#</sup>     | 0.91<br>(0.71-0.99) |
| Connell et al. (2001) <sup>30</sup>                  | 72                   | 0<br>(0.00-0.50)    | 10 <sup>#</sup>     | NR                  |
| <b>Thickness</b>                                     |                      |                     |                     |                     |
| Toprak et al. (2012) <sup>27</sup> (capitellar)      | 248                  | 0.52<br>(0.46-0.58) | 160 <sup>#</sup>    | 0.80<br>(0.73-0.86) |
| Toprak et al. (2012) <sup>27</sup> (radiocapitellar) | 248                  | 0.38<br>(0.32-0.44) | 160 <sup>#</sup>    | 0.85<br>(0.79-0.90) |
| Lee et al. (2011) <sup>28</sup> (CSA cut-off)        | 51                   | 0.86<br>(0.74-0.94) | 63 <sup>#</sup>     | 0.83<br>(0.71-0.91) |
| Lee et al. (2011) <sup>28</sup> (CSA max)            | 51                   | 0.78<br>(0.65-0.89) | 63 <sup>#</sup>     | 0.95<br>(0.87-0.99) |
| Khoury and Cardinal (2009) <sup>17</sup>             | 8                    | 1.00<br>(0.63-1.00) | 8 <sup>@</sup>      | NR                  |
| du Toit et al. (2008) <sup>31</sup>                  | 18                   | 0.72<br>(0.47-0.90) | 19                  | 0.53<br>(0.29-0.76) |
| Miller et al. (2002) <sup>33</sup>                   | 8                    | 0.63<br>(0.24-0.91) | 6 <sup>§</sup>      | 1.00<br>(0.54-1.00) |
| Connell et al. (2001) <sup>30</sup>                  | 72                   | 0.35<br>(0.24-0.47) | 10 <sup>#</sup>     | NR                  |
| Maffulli et al. (1990) <sup>36</sup> (enthesopathy)  | 41                   | 0.12<br>(0.40-0.26) | 0                   | NA                  |
| Maffulli et al. (1990) <sup>36</sup> (tendonitis)    | 41                   | 0.37<br>(0.22-0.53) | 0                   | NA                  |
| Maffulli et al. (1990) <sup>36</sup> (peritonitis)   | 41                   | 0.10<br>(0.03-0.23) | 0                   | NA                  |
| <b>Enthesopathy</b>                                  |                      |                     |                     |                     |
| Khoury and Cardinal (2009) <sup>17</sup>             | 8                    | 0.63<br>(0.24-0.91) | 8 <sup>@</sup>      | NR                  |
| Noh et al. (2009) <sup>18</sup>                      | 27                   | 0.56<br>(0.35-0.75) | 27 <sup>#</sup>     | 0.85<br>(0.66-0.96) |
| Tarhan et al. (2009) <sup>35</sup>                   | 52                   | 0.08<br>(0.02-0.19) | 0                   | 0                   |



| Authors                                      | N=Symptomatic elbows | SnS                 | N=Asx or NSx elbows | Spc                 |
|----------------------------------------------|----------------------|---------------------|---------------------|---------------------|
| <b>Cortical irregularities</b>               |                      |                     |                     |                     |
| Obradov and Anderson (2012) <sup>26</sup>    | 49                   | 0.18<br>(0.09-0.32) | 10 <sup>#</sup>     | 1.00<br>(0.69-1.00) |
| Lee et al. (2011) <sup>28</sup>              | 51                   | 0.18<br>(0.08-0.31) | 63 <sup>#</sup>     | 0.95<br>(0.87-0.99) |
| Connell et al. (2001) <sup>30</sup>          | 72                   | 0.22<br>(0.13-0.34) | 10 <sup>#</sup>     | NR                  |
| <b>Cortical irregularities or bony spurs</b> |                      |                     |                     |                     |
| Toprak et al. (2012) <sup>27</sup>           | 248                  | 0.55<br>(0.48-0.61) | 160 <sup>#</sup>    | 0.91<br>(0.86-0.95) |
| du Toit et al. (2008) <sup>31</sup>          | 32                   | 0.63<br>(0.44-0.79) | 56 <sup>S</sup>     | 0.63<br>(0.49-0.75) |
| <b>Cortical spurs</b>                        |                      |                     |                     |                     |
| Zeisig et al. (2010) <sup>34</sup>           | 28                   | 0.08<br>(0.03-0.17) | 0                   | NA                  |
| Connell et al. (2001) <sup>30</sup>          | 72                   | 0.25<br>(0.11-0.45) | 10 <sup>#</sup>     | NR                  |
| <b>Tear</b>                                  |                      |                     |                     |                     |
| Obradov and Anderson (2012) <sup>26</sup>    | 49                   | 0.14<br>(0.06-0.27) | 10 <sup>#</sup>     | 1.00<br>(0.69-1.00) |
| Toprak et al. (2012) <sup>27</sup>           | 248                  | 0.35<br>(0.29-0.41) | 160 <sup>#</sup>    | 1.00<br>(0.98-1.00) |
| <b>Partial tear</b>                          |                      |                     |                     |                     |
| Khoury and Cardinal (2009) <sup>17</sup>     | 8                    | 0.38<br>(0.09-0.76) | 8 <sup>@</sup>      | NR                  |
| Tarhan et al. (2009) <sup>35</sup>           | 52                   | 0.10<br>(0.03-0.21) | 0                   | NA                  |
| Connell et al. (2001) <sup>30</sup>          | 72                   | 0.25<br>(0.16-0.37) | 10 <sup>#</sup>     | NR                  |
| <b>Full thickness tear</b>                   |                      |                     |                     |                     |
| Tarhan et al. (2009) <sup>35</sup>           | 52                   | 0.00<br>(0.00-0.70) | 0                   | NA                  |
| Connell et al. (2001) <sup>30</sup>          | 72                   | 0.03<br>(0.00-0.10) | 0                   | NR                  |
| <b>Adjacent fluid</b>                        |                      |                     |                     |                     |
| Lee et al 2010 <sup>28</sup>                 | 51                   | 0.04<br>(0.01-0.13) | 63                  | 1.00<br>(0.94-1.00) |

Key: NA, not applicable; NR, not reported

## Appendix 9. Criteria used to determine abnormal MSUS findings

| <b>Hypoechoogenicity</b>                              |             |                                                              |
|-------------------------------------------------------|-------------|--------------------------------------------------------------|
| <i>Authors</i>                                        | <i>Mark</i> | <i>Description</i>                                           |
| Noh et al., 2009                                      | A           | focal hypoechoogenicity on normal background                 |
| Connell et al., 2001                                  | A           | focal hypoechoogenicity on normal background                 |
| Struijs et al., 2005                                  | A           | focal hypoechoogenicity on normal background                 |
| De Zordo et al., 2009<br>(anterior section)           | B           | focal lesions with areas of degeneration and partial rupture |
| De Zordo et al., 2009<br>(middle section)             | B           | focal lesions with areas of degeneration and partial rupture |
| De Zordo et al., 2009<br>(posterior section)          | B           | focal lesions with areas of degeneration and partial rupture |
| Lee et al., 2011                                      | X           | as a rounded spot and not associated with disruption         |
| Khoury and Cardinal<br>2009                           | X           | hypoechoogenicity with or without tendon thickening          |
| Miller et al., 2002<br>(deep to tendon)               | X           | hypochoic fluid between the tendon and the epicondyle        |
| Miller et al., 2002<br>(general<br>hypoechoogenicity) | X           | relative to the contralateral elbow                          |
| Zeisig et al., 2006                                   | X           | with diffuse heterogeneity and hypoechoogenicity             |
| Obradov and<br>Anderson 2012                          | X           | focal lesion                                                 |
| <b>Calcifications</b>                                 |             |                                                              |
| <i>Authors</i>                                        | <i>Mark</i> | <i>Description</i>                                           |
| Lee et al., 2011                                      | A           | intratendinous                                               |
| Khoury and Cardinal<br>2009                           | A           | intratendinous                                               |
| Obradov and<br>Anderson 2012 (int<br>calc)            | A           | intratendinous                                               |
| Toprak et al., 2012                                   | A           | intratendinous                                               |
| Connell et al., 2001                                  | X           | focal areas                                                  |
| Tarhan et al., 2009                                   | X           | focal areas                                                  |
| Struijs et al., 2005                                  | X           | no description                                               |
| Zeisig et al., 2006                                   | X           | with local steroid injections only                           |
| Obradov and<br>Anderson 2012                          | X           | no description                                               |
| Obradov and<br>Anderson 2012 (ext<br>calc)            | X           | external                                                     |

| <b>Neovascularity</b>                            |             |                                                                        |
|--------------------------------------------------|-------------|------------------------------------------------------------------------|
| <i>Authors</i>                                   | <i>Mark</i> | <i>Description</i>                                                     |
| Khoury and Cardinal 2009                         | X           | no description                                                         |
| du Toit et al., 2008                             | A           | presence of neovessel diameter of more than 1 mm                       |
| Zeisig et al., 2010                              | X           | high blood flow                                                        |
| Zeisig et al., 2006                              | X           | inside and outside the dorsal part of the tendon                       |
| Obradov and Anderson 2012                        | X           | no description                                                         |
| Obradov and Anderson 2012 (including HE regions) | X           | including hypoechoic regions                                           |
| Obradov and Anderson 2012 (excluding HE regions) | X           | excluding hypoechoic regions                                           |
| Toprak et al., 2012                              | A           | new vessel formation thicker than 1mm within or near the CEO           |
| Connell et al., 2001                             | X           | no description                                                         |
| <b>Thickness</b>                                 |             |                                                                        |
| <i>Authors</i>                                   | <i>Mark</i> | <i>Description</i>                                                     |
| Connell et al., 2001                             | A           | Enlarged or attenuated if there was a 10% difference with normal elbow |
| du Toit et al., 2008                             | A           | Enlarged or attenuated if there was a 10% difference with normal elbow |
| Lee et al., 2011 (CSA cut-off)                   | X           | quantitative, transverse images                                        |
| Lee et al., 2011 (CSA max)                       | X           | quantitative, transverse images                                        |
| Toprak et al., 2012 (capitellar)                 | X           | quantitative, longitudinal images                                      |
| Toprak et al., 2012 (radiocapitellar)            | X           | quantitative, longitudinal images                                      |
| Khoury and Cardinal 2009                         | X           | measured with compression                                              |
| Miller et al., 2002                              | X           | thickening or thinning                                                 |
| Maffulli et al., 1990 (enthesopathy)             | X           | proximal part of the tendon was enlarged                               |
| Maffulli et al., 1990 (tendonitis)               | X           | tendon of ECRB was enlarged                                            |
| Maffulli et al., 1990 (peritonitis)              | X           | peritendinous lining was enlarged                                      |

| <b>Enthesopathy</b>                                    |             |                                                                                                                                                     |
|--------------------------------------------------------|-------------|-----------------------------------------------------------------------------------------------------------------------------------------------------|
| <i>Authors</i>                                         | <i>Mark</i> | <i>Description</i>                                                                                                                                  |
| Struijs et al., 2005                                   | A           | proximal part of the tendon enlarged with alterations in echogenicity                                                                               |
| Tarhan et al., 2009                                    | A           | proximal part of the tendon enlarged with alterations in echogenicity                                                                               |
| Maffulli et al., 1990                                  | A           | proximal part of the tendon enlarged with alterations in echogenicity                                                                               |
| Khoury and Cardinal 2009                               | X           | no description                                                                                                                                      |
| Noh et al., 2009                                       | X           | Echogenicity at the ECRB insertion                                                                                                                  |
| <b>Cortical irregularities</b>                         |             |                                                                                                                                                     |
| <i>Authors</i>                                         | <i>Mark</i> | <i>Description</i>                                                                                                                                  |
| Lee et al., 2011                                       | A           | adjacent bone irregularity                                                                                                                          |
| Connell et al., 2001                                   | A           | irregular bony surface                                                                                                                              |
| Obradov and Anderson 2012                              | A           | cortical bone irregularity                                                                                                                          |
| <b>Cortical spurs</b>                                  |             |                                                                                                                                                     |
| <i>Authors</i>                                         | <i>Mark</i> | <i>Description</i>                                                                                                                                  |
| Connell et al., 2001                                   | A           | spur formation                                                                                                                                      |
| Zeisig et al., 2010                                    | A           | spur formation                                                                                                                                      |
| <b>Bone changes (cortical irregularities or spurs)</b> |             |                                                                                                                                                     |
| <i>Authors</i>                                         | <i>Mark</i> | <i>Description</i>                                                                                                                                  |
| Toprak et al., 2012                                    | A           | any irregularity of the bony surface                                                                                                                |
| du Toit et al., 2008                                   | A           | cortical spurring or any bone irregularity                                                                                                          |
| <b>Tear</b>                                            |             |                                                                                                                                                     |
| <i>Authors</i>                                         | <i>Mark</i> | <i>Description</i>                                                                                                                                  |
| Obradov and Anderson 2012                              | X           | no description                                                                                                                                      |
| Toprak et al., 2012                                    | X           | loss of fibrillar continuity, if within the tendon, intrasubstantial                                                                                |
| <b>Partial tear</b>                                    |             |                                                                                                                                                     |
| <i>Authors</i>                                         | <i>Mark</i> | <i>Description</i>                                                                                                                                  |
| Khoury and Cardinal 2009                               | X           | tear                                                                                                                                                |
| Connell et al., 2001                                   | A           | focal anechoic area with no fibers intact or an echogenic irregular band that could run either horizontally or longitudinally in the CEO            |
| Tarhan et al., 2009                                    | A           | focal anechoic area with no fibers intact or an echogenic irregular band that could run either horizontally or longitudinally in the CEO            |
| <b>Full thickness tear</b>                             |             |                                                                                                                                                     |
| <i>Authors</i>                                         | <i>Mark</i> | <i>Description</i>                                                                                                                                  |
| Connell et al., 2001                                   | A           | Distinct complete interval traversing or extending through the full width of the CEO. Confirmation was performed in at least two planes of imaging. |
| Tarhan et al., 2009                                    | A           | Distinct complete interval traversing or extending through the full width of the CEO. Confirmation was performed in at least two planes of imaging. |

Note: A and B mark those diagnostic criteria which were similar. X marks those diagnostic criteria which were different from each other and thus, cannot be pooled into one classification. Key: CEO, common extensor origin; ECRB, Extensor Carpi Radialis Brevis; MSUS, musculoskeletal

## Appendix 10. Similarities of collected MSUS data in 15 diagnostic studies

|                             | MSUS Findings                                |      |      |      |       |                |      |      | Other variables obtained during data collection |                         |                                                    |                 |                                  |                                                           |
|-----------------------------|----------------------------------------------|------|------|------|-------|----------------|------|------|-------------------------------------------------|-------------------------|----------------------------------------------------|-----------------|----------------------------------|-----------------------------------------------------------|
|                             | HE                                           | Calc | Neov | Enth | Thick | Cortical irreg | Spur | Tear | Inclusion Criteria reported (Y/N)               | Reference standard used | Frequency of linear transducer head reported (Y/N) | Qualified? Y, N | Age (if mean is 35-60 years old) | Duration of symptoms (Y if more than or equal to 6 weeks) |
| Obradov and Anderson (2012) | X                                            | A    | X    | --   | --    | A              | --   | X    | Y                                               | B                       | Y                                                  | Y               | Y                                | Y                                                         |
| Toprak et al. (2012)        | --                                           | A    | A    | --   | B     | --             | --   | X    | Y                                               | A                       | Y                                                  | Y               | Y                                | Y                                                         |
| Lee et al. (2011)           | X                                            | A    | --   | --   | B     | A              | --   | --   | Y                                               | A                       | Y                                                  | Y               | Y                                | Y                                                         |
| Zeisig et al. (2010)        | --                                           | --   | X    | --   | --    | --             | A    | --   | Y                                               | C                       | Y                                                  | Y               | Y                                | Y                                                         |
| Noh et al. (2009)           | A                                            | --   | --   | X    | --    | --             | --   | --   | Y                                               | B                       | N                                                  | Y               | Y                                | Y                                                         |
| De Zordo et al. (2009)      | B^<br>(anterior, middle, posterior sections) | --   | --   | --   | --    | --             | --   | --   | Y^                                              | A^                      | Y^                                                 | Y^              | Y^                               | Y^                                                        |
| Khoury and Cardinal (2009)  | X                                            | A    | X    | X    | X     | --             | --   | X    | Y                                               | A                       | Y                                                  | Y               | Y                                | --                                                        |
| Tarhan et al. (2009)        | --                                           | X    | --   | A    | --    | --             | --   | A,B  | Y                                               | A                       | Y                                                  | Y               | Y                                | Y                                                         |
| du Toit et al. (2008)       | --                                           | --   | A    | --   | A     | --             | --   | --   | Y                                               | A                       | Y                                                  | Y               | Y                                | Y                                                         |
| Zeisig et al. (2006)        | X                                            | X    | X    | --   | --    | --             | --   | --   | Y                                               | A                       | Y                                                  | Y               | Y                                | Y                                                         |
| Struijs et al. (2005)       | A                                            | X    | --   | A    | --    | --             | --   | --   | Y                                               | A                       | Y                                                  | Y               | Y                                | Y                                                         |
| Levin et al. (2005)         | --                                           | --   | --   | --   | --    | --             | --   | --   | Y                                               | A                       | Y                                                  | Y               | Y                                | --                                                        |
| Miller et al. (2002)        | X                                            | --   | --   | --   | X     | --             | --   | --   | Y                                               | A                       | Y                                                  | Y               | Y                                | Y                                                         |
| Connell et al. (2001)       | A                                            | X    | X    | --   | A     | A              | A    | A,B  | Y                                               | A                       | Y                                                  | Y               | Y                                | Y                                                         |
| Maffulli et al. (1990)      | --                                           | --   | --   | A    | X     | --             | --   | --   | Y                                               | A                       | Y                                                  | Y               | N                                | Y                                                         |

Note: A and B marks report studies which used similar diagnostic criteria. X mark indicates those studies which used different diagnostic criteria and thus not pooled. Key: Calc, calcifications; Enth, enthesopathy; HE, hypoechogenicity; irreg, irregularities; MSUS, musculoskeletal ultrasound; N, no; Neov, neovascularity; Y, Yes;--, not reported; ^, used real time sonoelastography

## Appendix 11. Forest Plots of on Diagnostic Validity of Abnormal MSUS findings

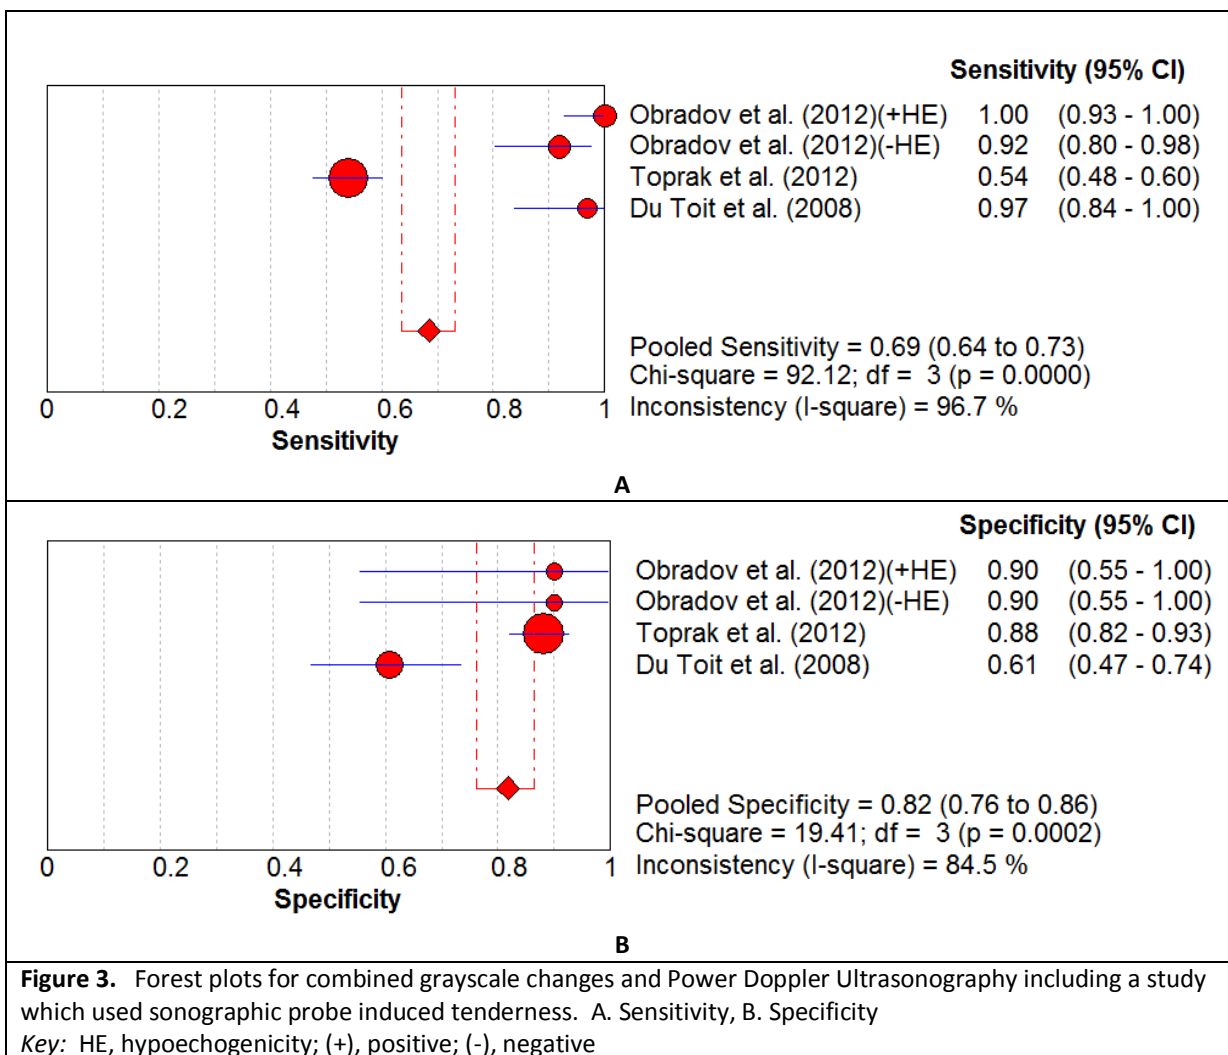



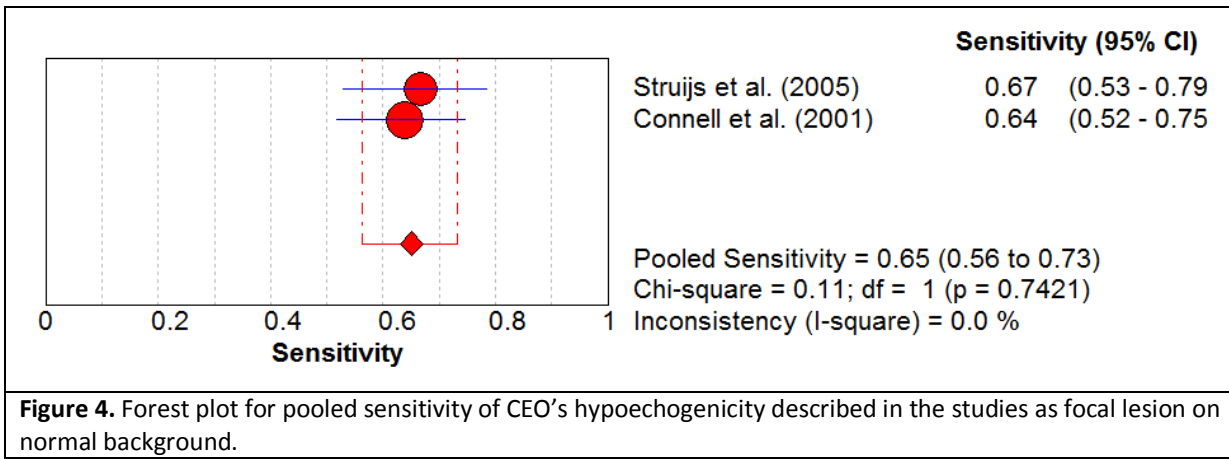

**Figure 4.** Forest plot for pooled sensitivity of CEO's hypoechoogenicity described in the studies as focal lesion on normal background.

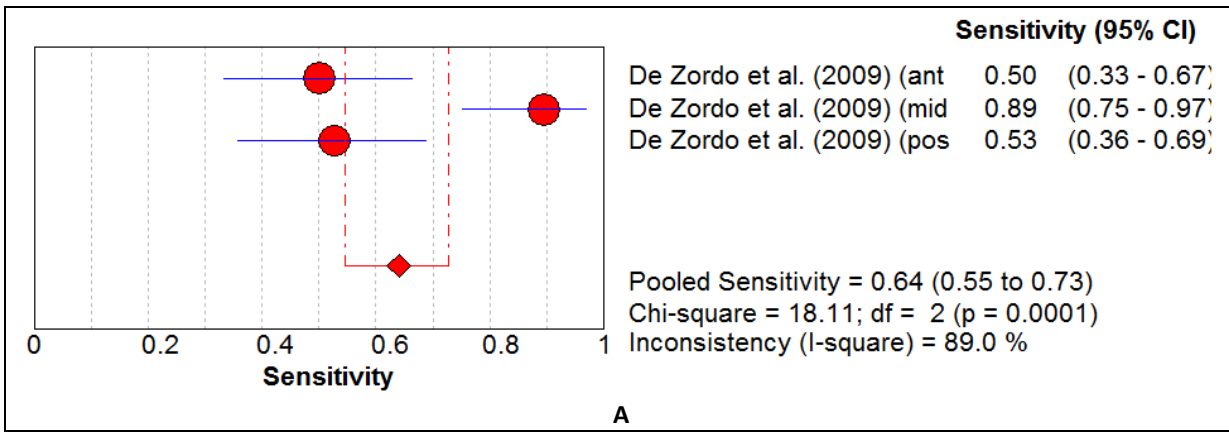

A

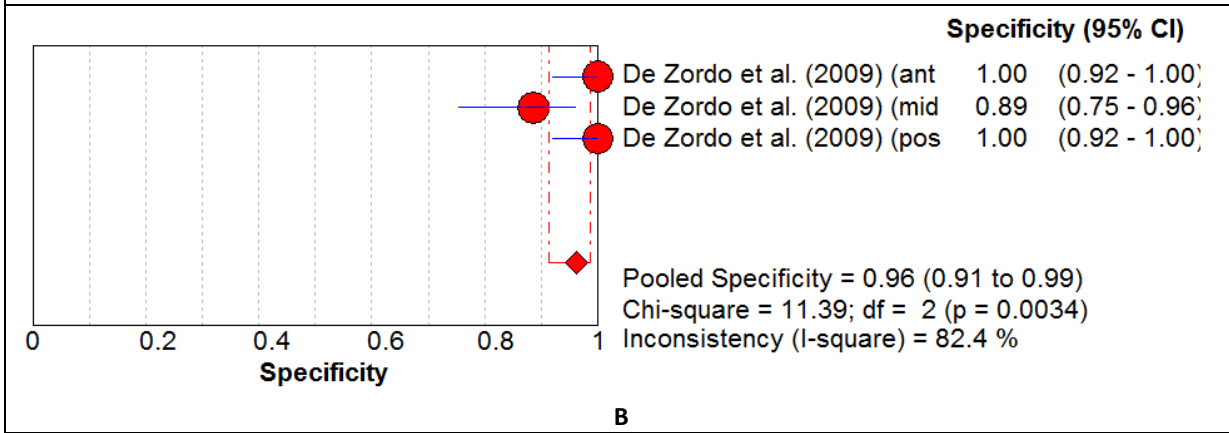

B

**Figure 5.** Forest plots for CEO hypoechoogenicity described as focal lesion in areas of degeneration and partial rupture. A. Sensitivity, B. Specificity

Key: ant, anterior; mid, middle; pos, posterior

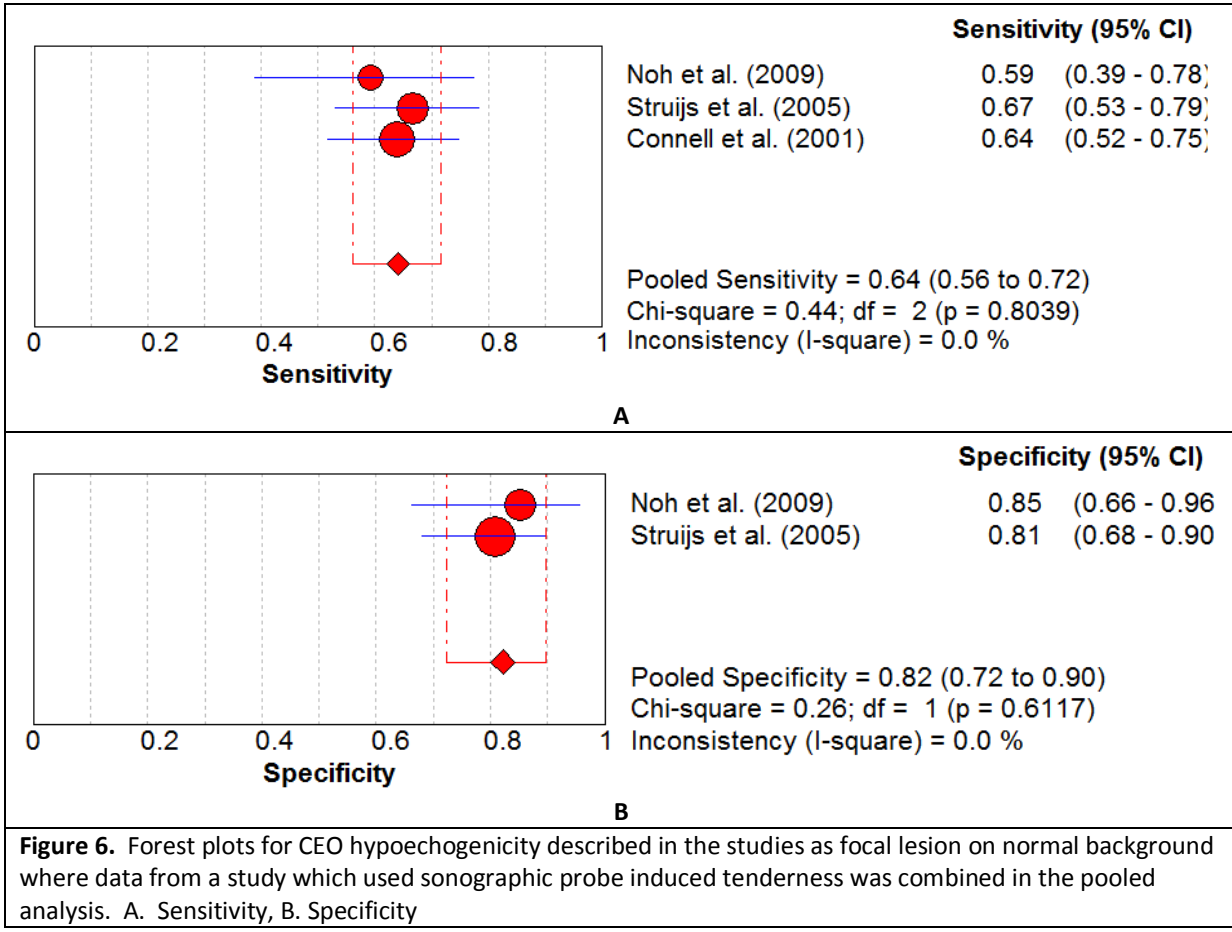

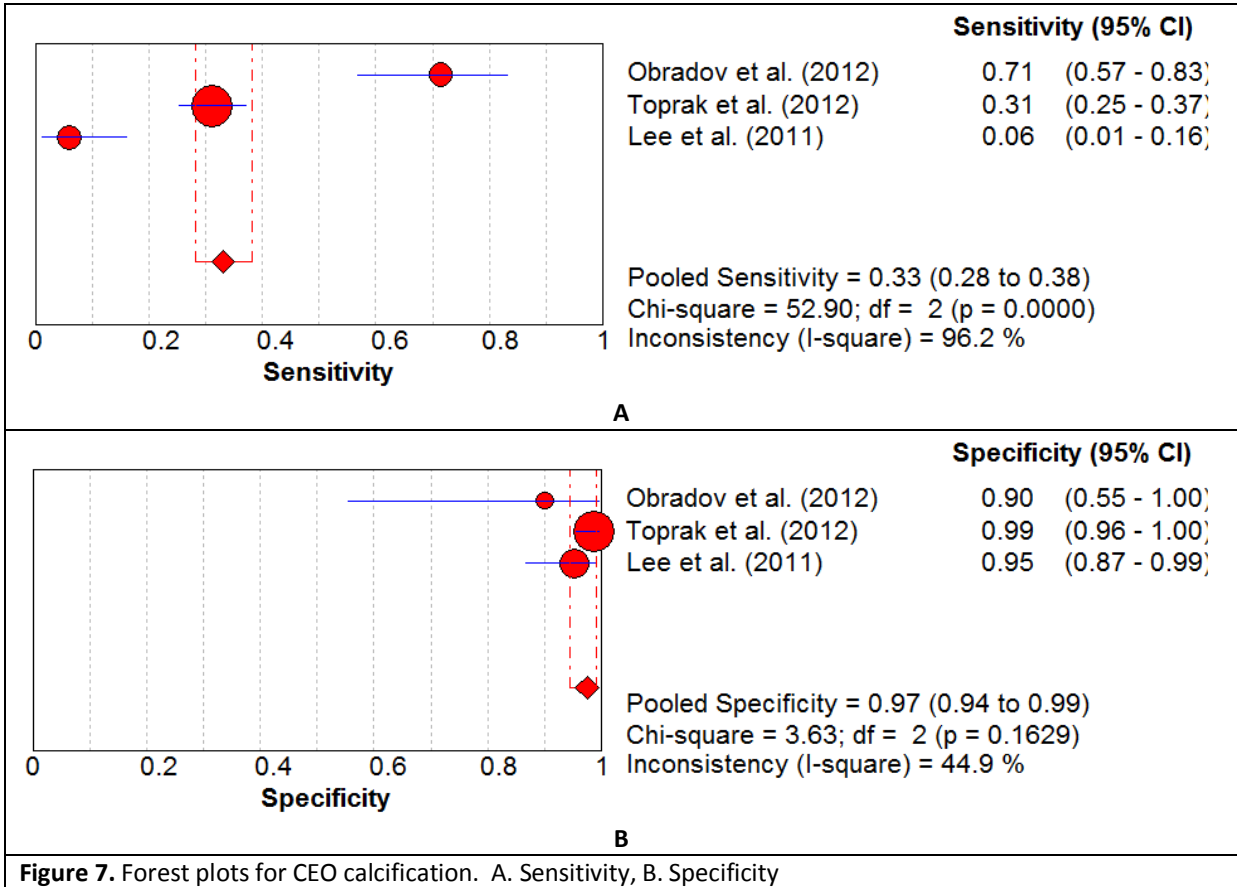

Figure 7. Forest plots for CEO calcification. A. Sensitivity, B. Specificity

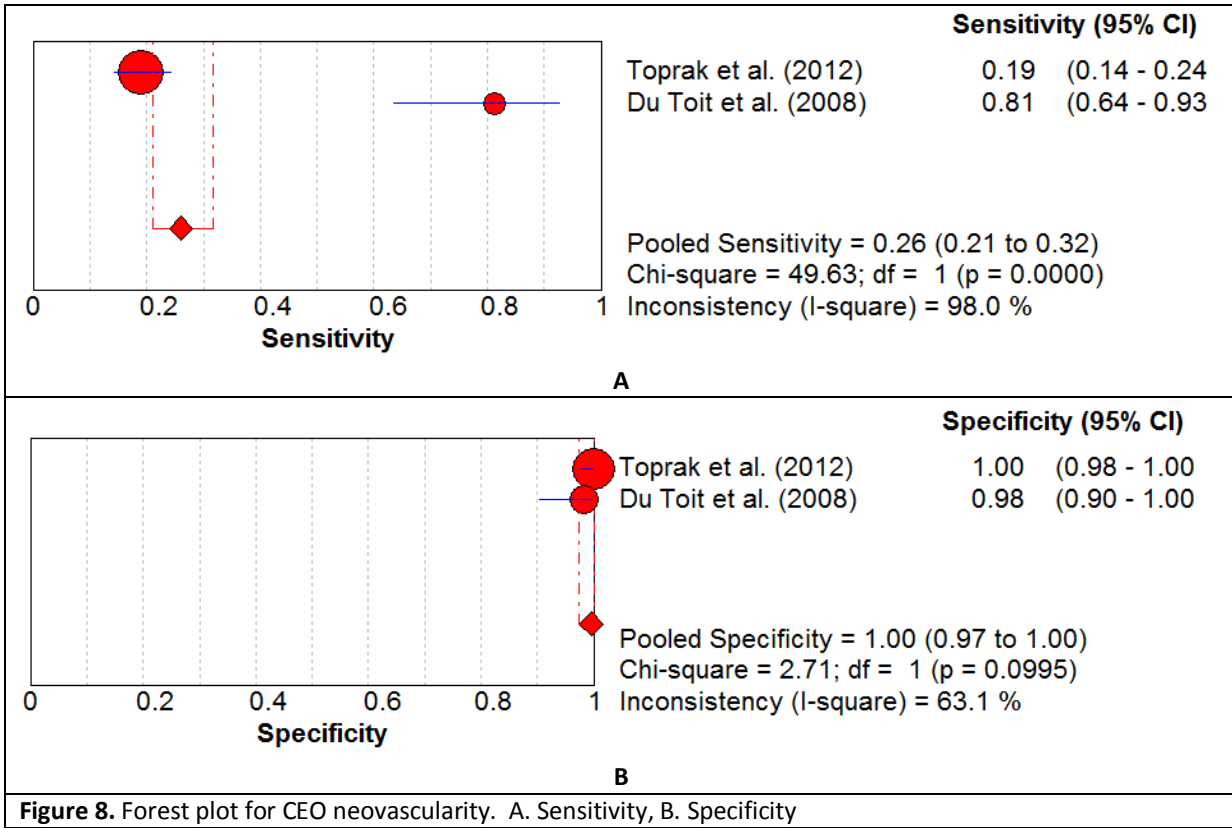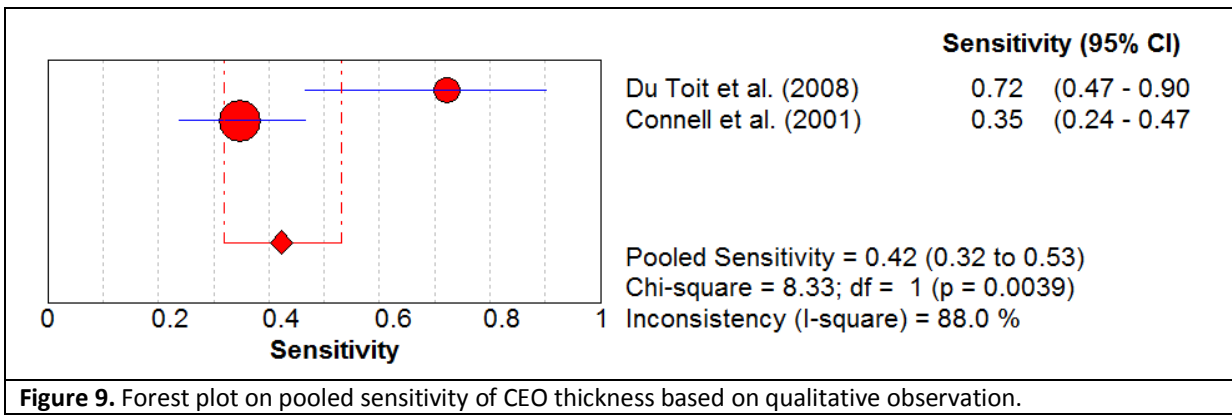

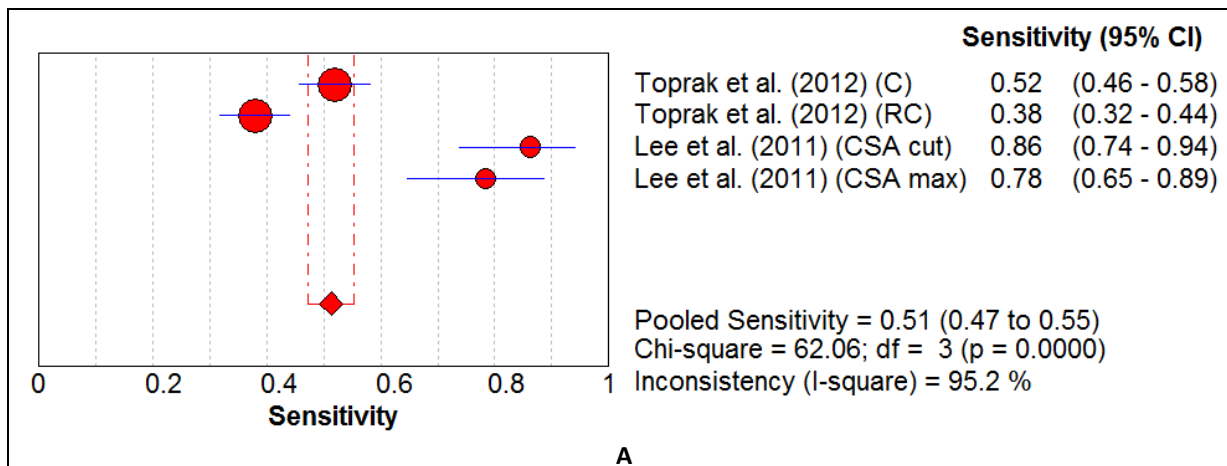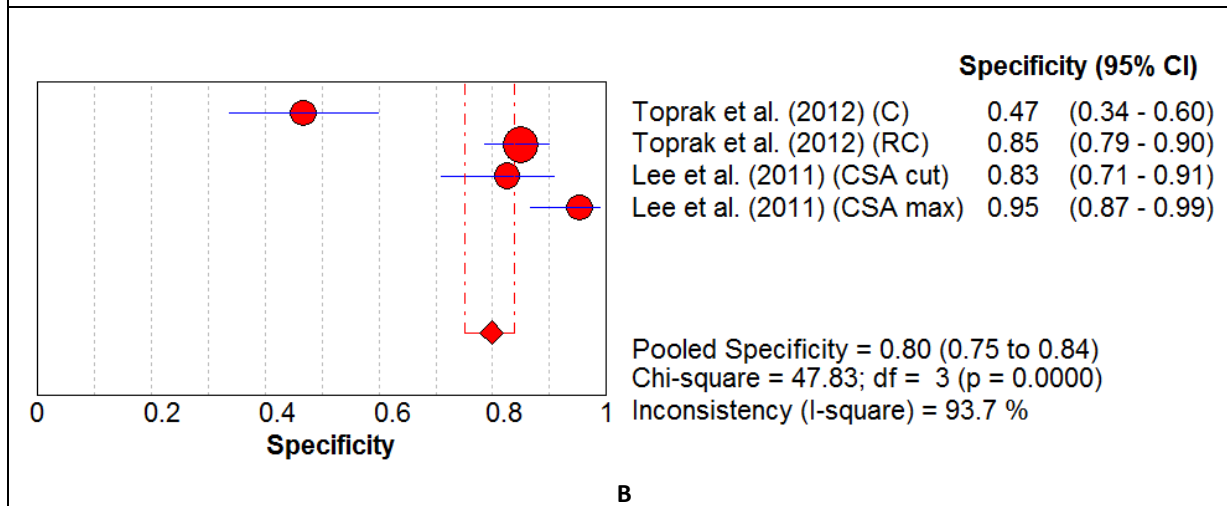

**Figure 10.** Forest plots of CEO thickness based on quantitative measurements. A. Sensitivity, B. Specificity.

Key: C, capitellar; CSA, cross-sectional area; cut, cut-off; RC, radiocapitellar

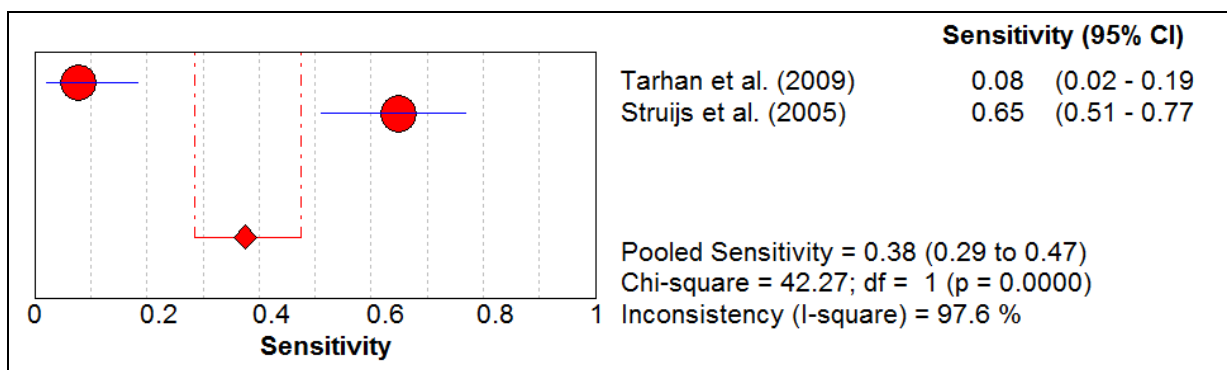

**Figure 11.** Forest plot for pooled sensitivity of CEO enthesopathy

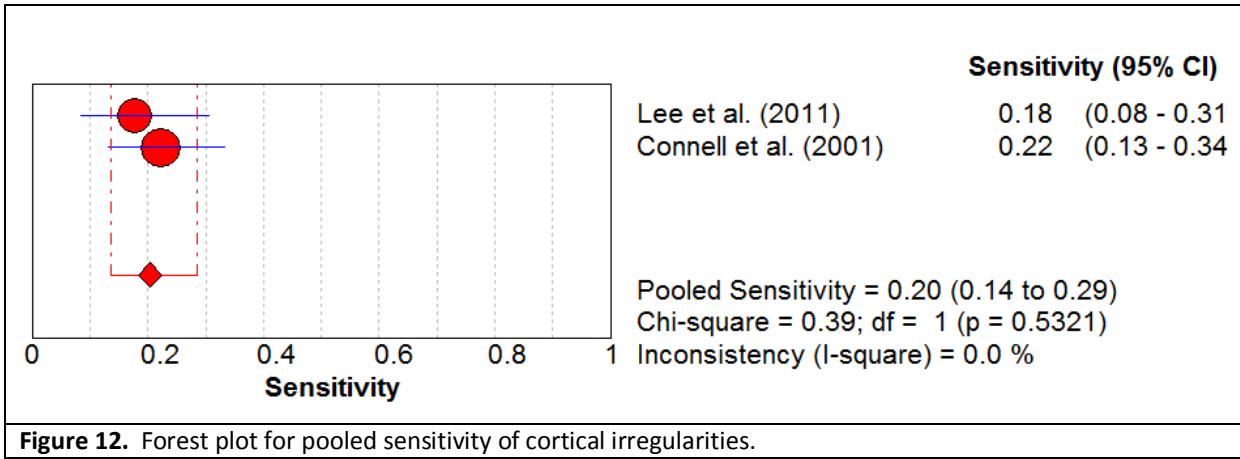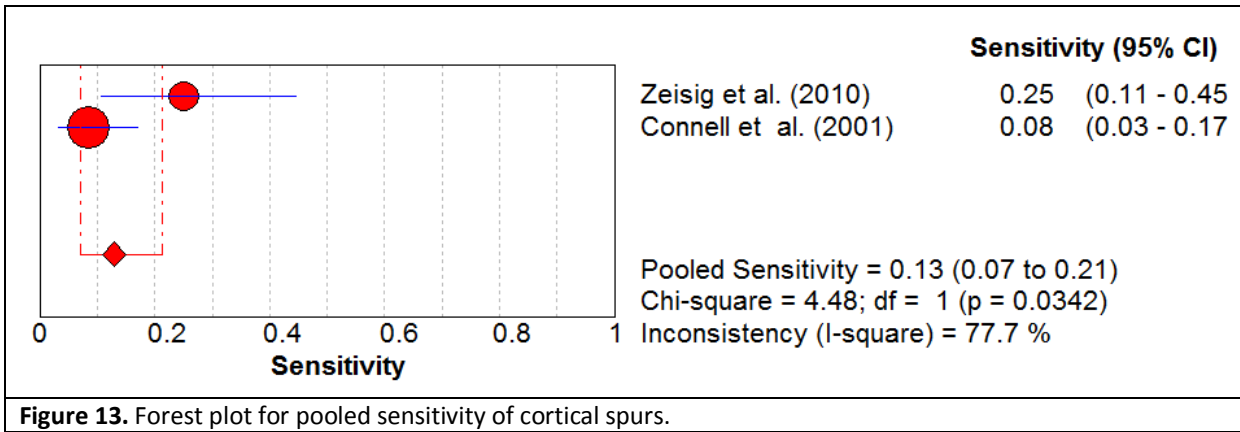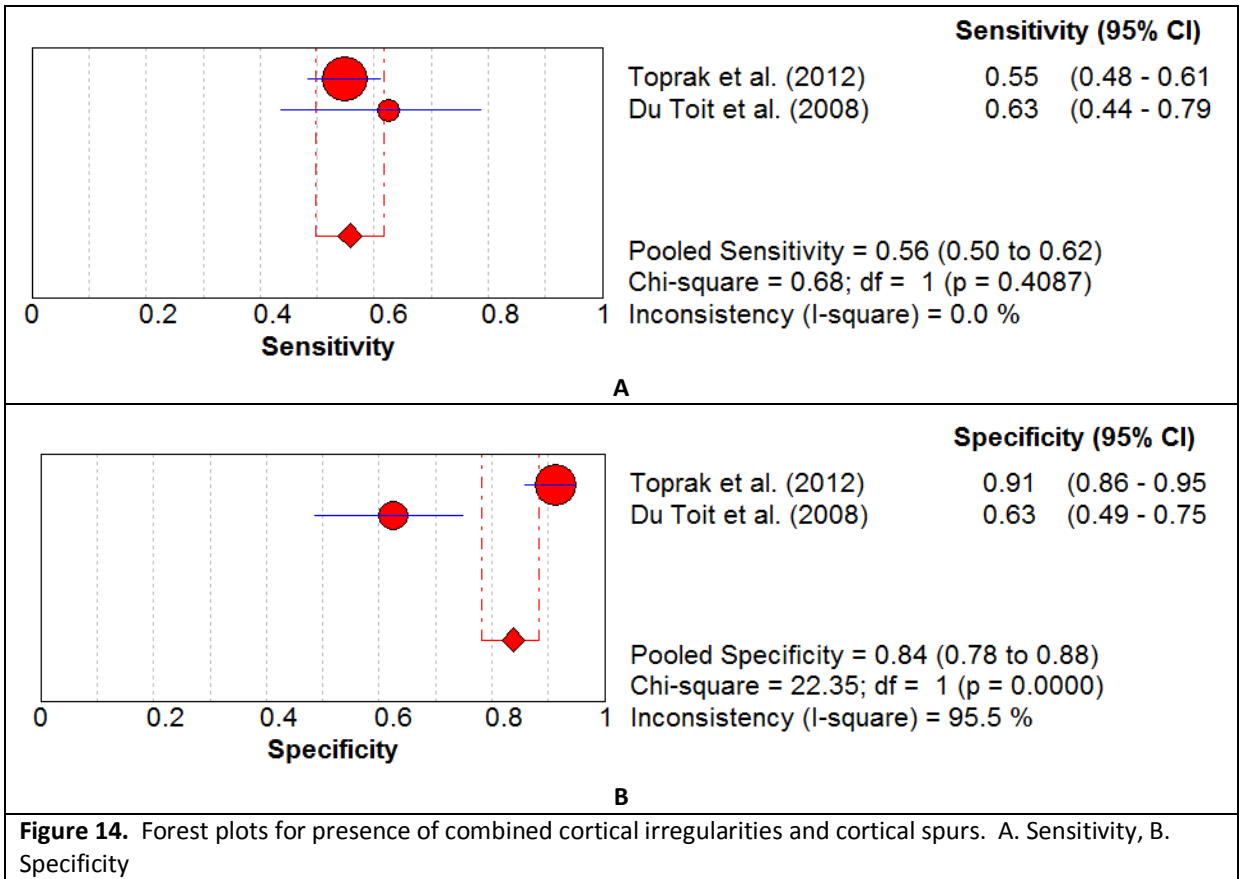

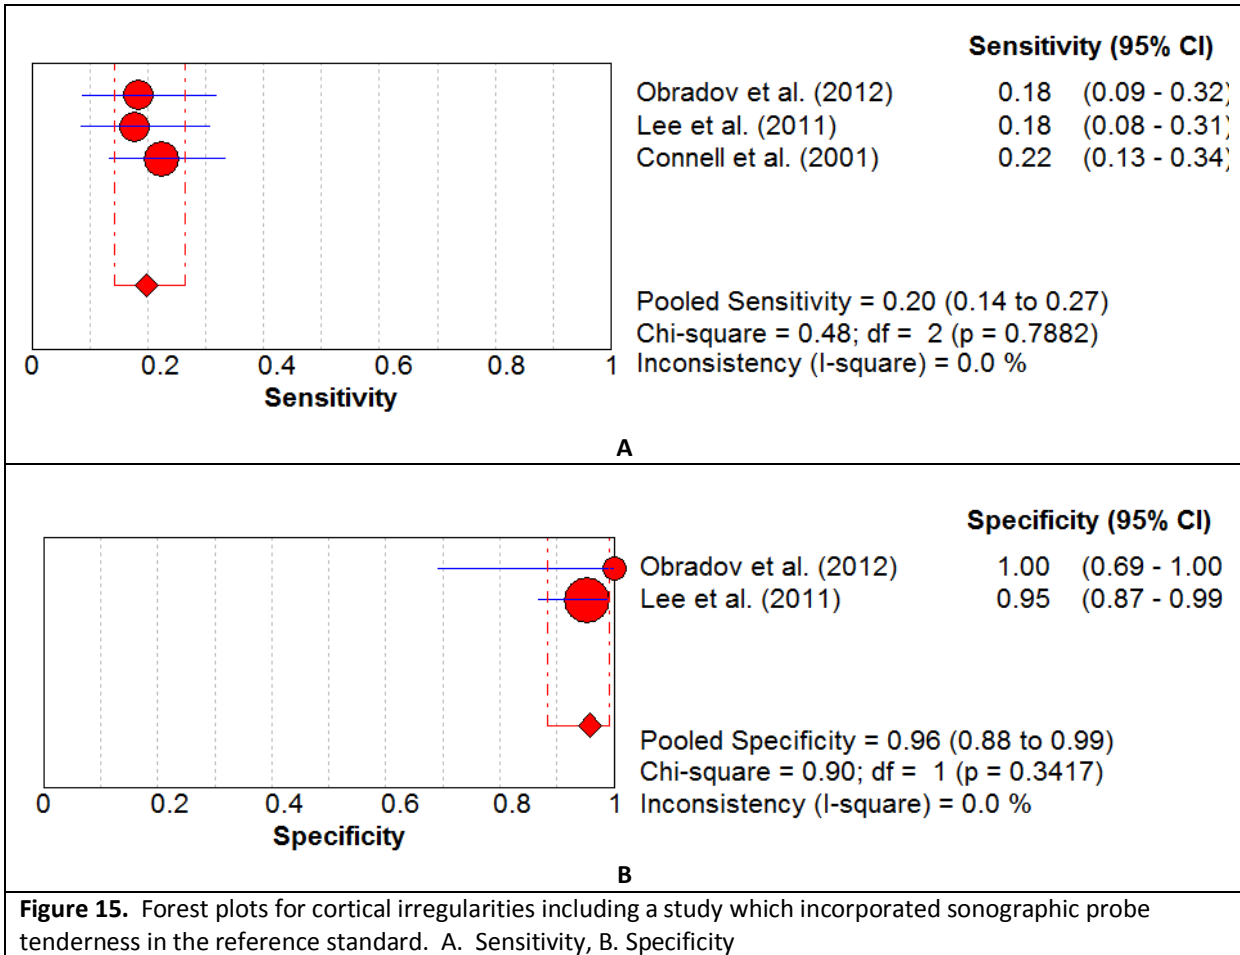

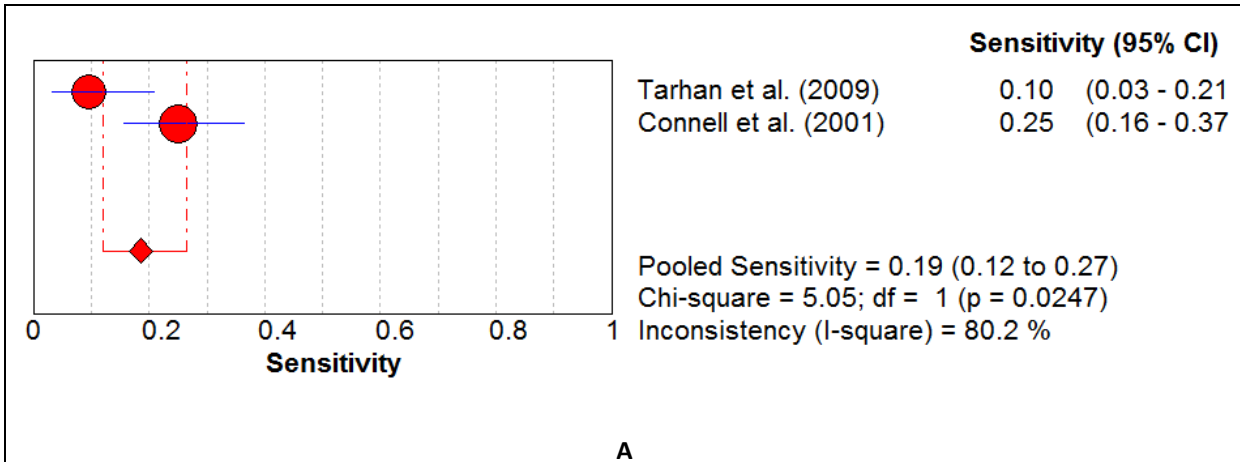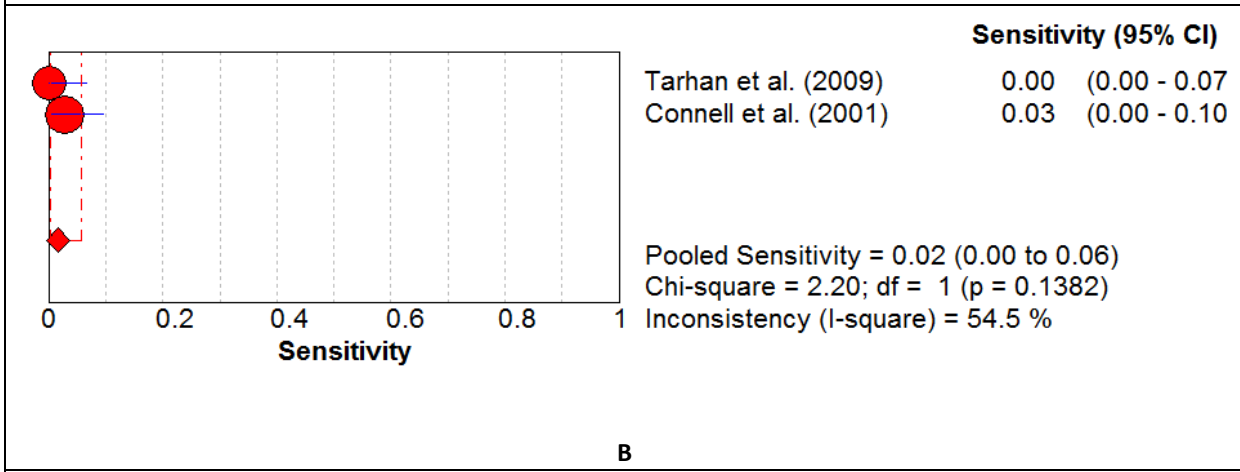

**Figure 16.** Forest plots for pooled sensitivity of CEO tear. A. Partial tear B. Full tear
